# Supplementary material
Source: publisher figshare collection journal article supplement (https://acs.figshare.com/ndownloader/files/4100623)

## **Supporting Information for**

### **Gold-catalyzed domino cycloisomerization/Pictet-Spengler reaction of 2-(4-aminobut-1-yn-1-yl)anilines with aldehydes: Synthesis of tetrahydropyrido[4,3-*b*]indole scaffolds**

B. V. Subba Reddy,<sup>\*,†</sup> Manisha Swain,<sup>†</sup> S. Madhusudana Reddy,<sup>†</sup> J. S. Yadav,<sup>\*,†</sup> B. Sridhar,<sup>‡</sup>

<sup>††</sup>*Natural Product Chemistry, ‡Laboratory of X-ray Crystallography, CSIR-Indian Institute of  
Chemical Technology, Hyderabad –500007, India.*

E-mail: *basireddy@iict.res.in; yadavpub@iict.res.in*

Fax: +91-40-27160512

#### **Table of Contents:**

|    |                                                                                           |         |
|----|-------------------------------------------------------------------------------------------|---------|
| 1. | X-ray structure of product <b>3g</b>                                                      | S2-S3   |
| 2. | Copies of <sup>1</sup> H and <sup>13</sup> C NMR spectras of starting materials           | S4-S9   |
| 3. | Copies of <sup>1</sup> H and <sup>13</sup> C NMR isotryptamine intermediate ( <b>1c</b> ) | S10-S11 |
| 4. | Copies of <sup>1</sup> H and <sup>13</sup> C NMR spectra of products                      | S12-S48 |

## 1. X Ray Crystallography data

X-ray data for the compounds were collected at room temperature using a Bruker Smart Apex CCD diffractometer with graphite monochromated MoK $\alpha$  radiation ( $\lambda=0.71073\text{\AA}$ ) with  $\omega$ -scan method [1]. Preliminary lattice parameters and orientation matrices were obtained from four sets of frames. Unit cell dimensions were determined using 7382 reflections in the range of  $2.44 < \theta < 26.79^\circ$  for AN72.

Integration and scaling of intensity data were accomplished using SAINT program.<sup>[1]</sup> The structure was solved by direct methods using SHELXS97<sup>[2]</sup> and refinement was carried out by full-matrix least-squares technique using SHELXL97.<sup>[2]</sup> Anisotropic displacement parameters were included for all non-hydrogen atoms. The hydrogen atoms attached to nitrogen atoms were located in a difference density map and refined isotropically. All other H atoms were positioned geometrically and treated as riding on their parent C atoms [C-H = 0.93-0.97  $\text{\AA}$  and  $U_{\text{iso}}(\text{H}) = 1.5U_{\text{eq}}(\text{C})$  for methyl H or  $1.2U_{\text{eq}}(\text{C})$  for other H atoms]. The methyl groups were allowed to rotate but not to tip.

Crystal data for AN72:  $\text{C}_{24}\text{H}_{21}\text{FN}_2\text{O}_2\text{S}$ ,  $M = 420.49$ , colorless block,  $0.18 \times 0.16 \times 0.13 \text{ mm}^3$ , monoclinic, space group  $P2_1/n$  (No. 14),  $a = 15.906(4)$ ,  $b = 14.318(3)$ ,  $c = 18.234(4) \text{ \AA}$ ,  $\beta = 97.792(4)^\circ$ ,  $V = 4114.1(16) \text{ \AA}^3$ ,  $Z = 8$ ,  $D_c = 1.358 \text{ g/cm}^3$ ,  $F_{000} = 1760$ , CCD Area Detector, MoK $\alpha$  radiation,  $\lambda = 0.71073 \text{ \AA}$ ,  $T = 294(2)\text{K}$ ,  $2\theta_{\text{max}} = 50.0^\circ$ , 38686 reflections collected, 7245 unique ( $R_{\text{int}} = 0.0313$ ). Final  $\text{Goof} = 1.063$ ,  $R1 = 0.0395$ ,  $wR2 = 0.1003$ ,  $R$  indices based on 5440 reflections with  $I > 2\sigma(I)$  (refinement on  $F^2$ ), 550 parameters, 0 restraints,  $\mu = 0.190 \text{ mm}^{-1}$ .

**CCDC 900791** contains supplementary Crystallographic data for the structure **3g**.

Figure Caption: A view of AN72, showing the atom-labelling scheme. Displacement ellipsoids are drawn at the 30% probability level and H atoms are represented by circles of arbitrary radii.

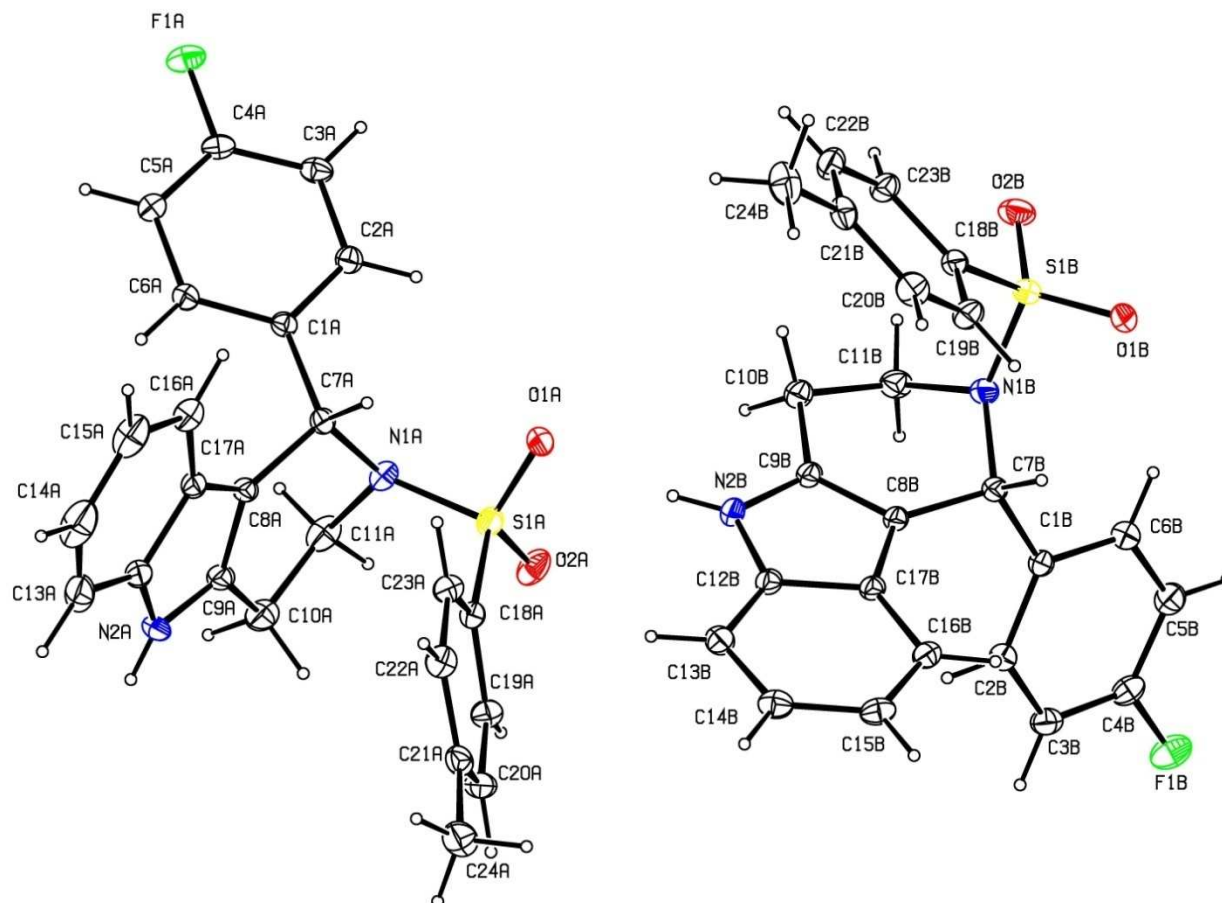

**Figure 1:** ORTEP diagram of product **3g** (Table 2, Entry **g**)

## **References:**

1. Bruker (2001). SAINT (Version 6.28a) & SMART (Version 5.625). Bruker AXS Inc., Madison, Wisconsin, USA.
2. Sheldrick, G. M. *Acta Crystallogr* **2008**, *A64*, 112-122.

3. Copies of  $^1\text{H}$  and  $^{13}\text{C}$  NMR spectra of starting materials:

*N*-(But-3-yn-1-yl)-4-methylbenzenesulfonamide:

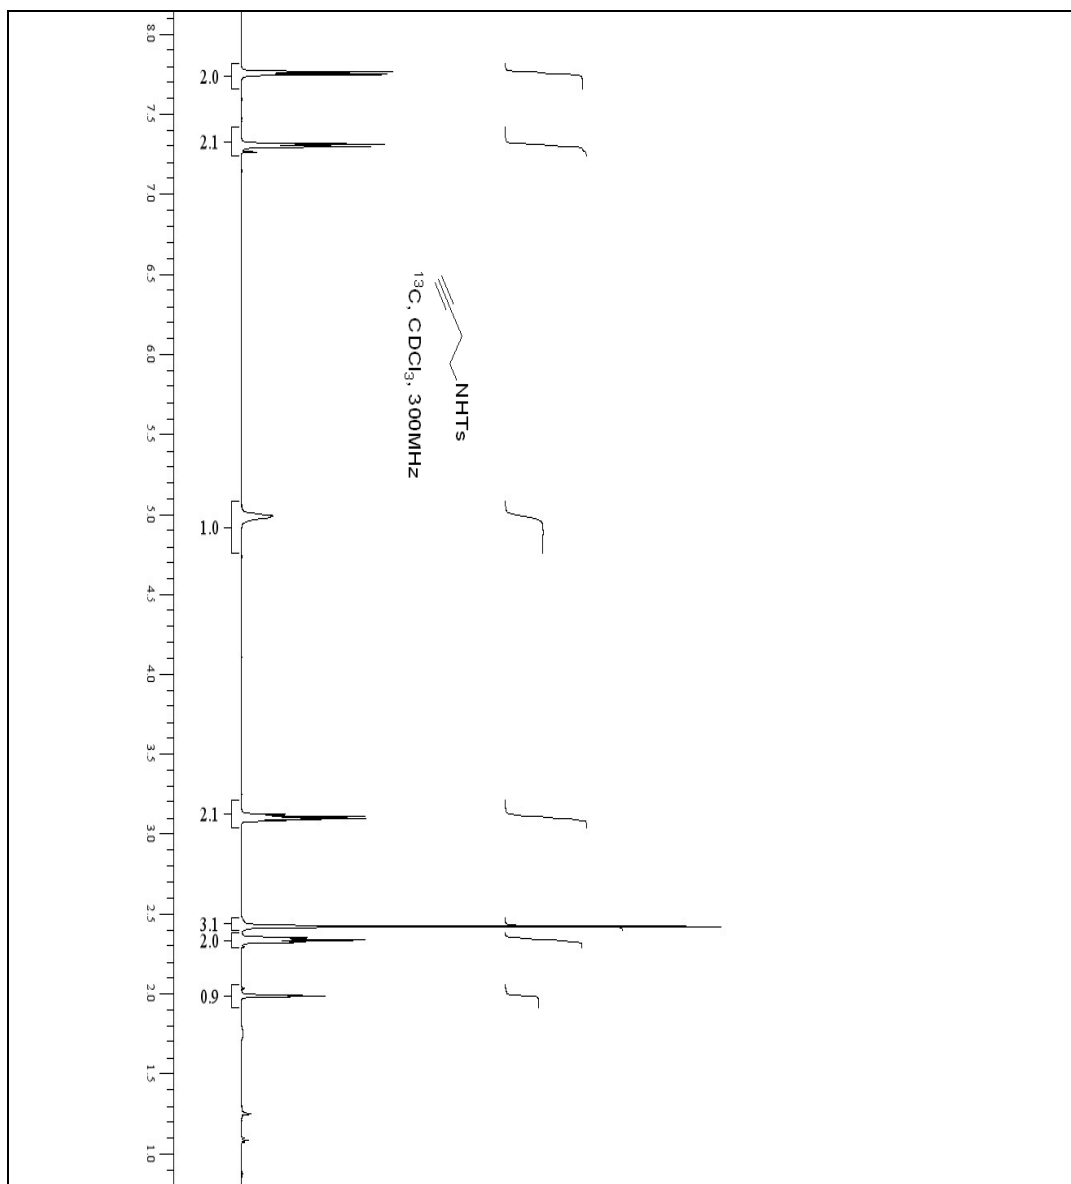

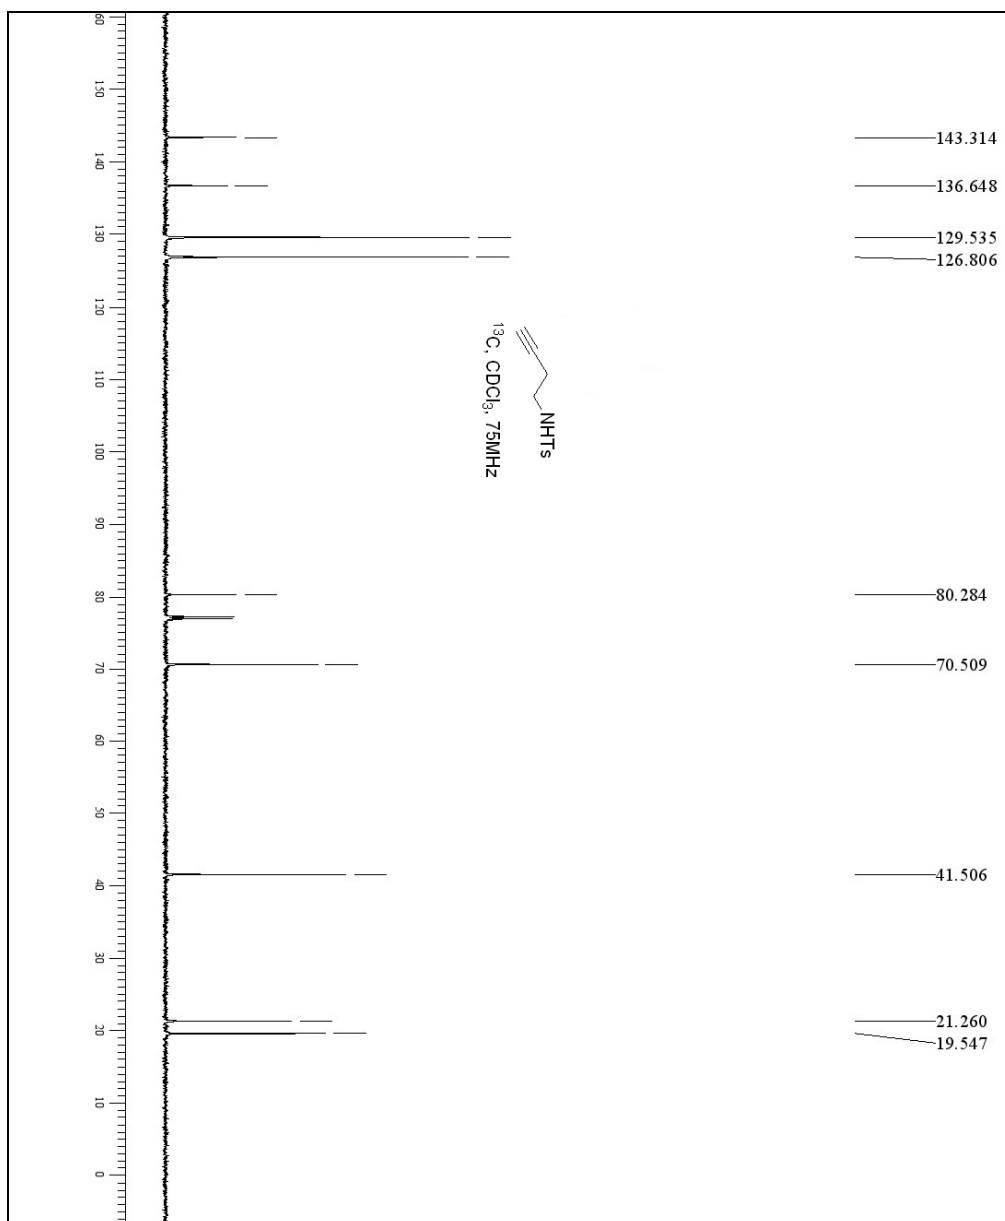

***N*-(4-(2-Aminophenyl)but-3-yn-1-yl)-4-methylbenzenesulfonamide:**

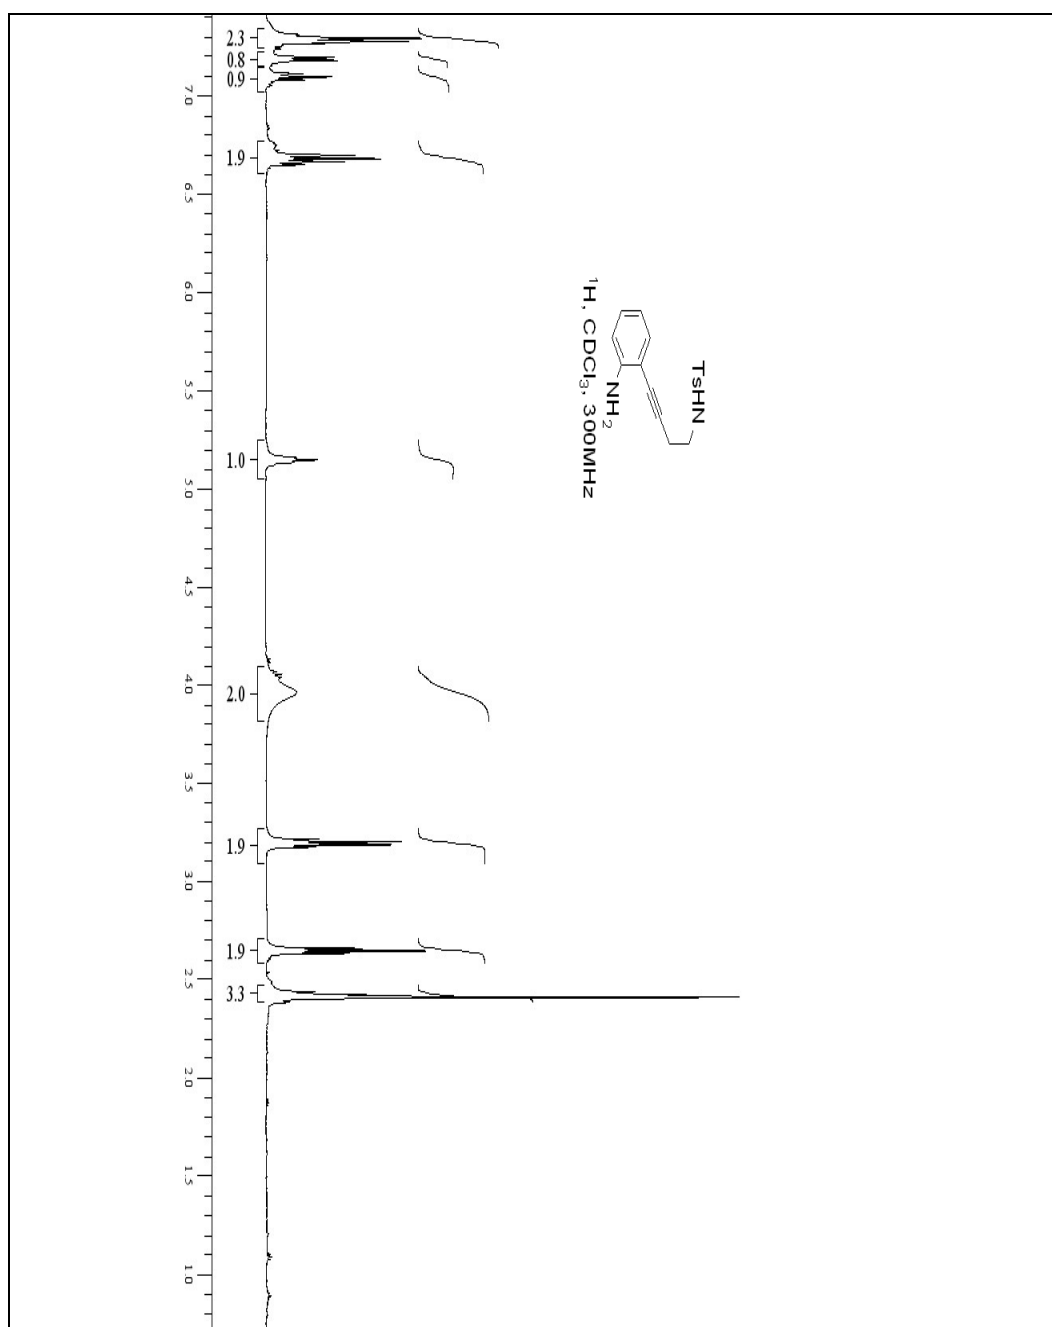

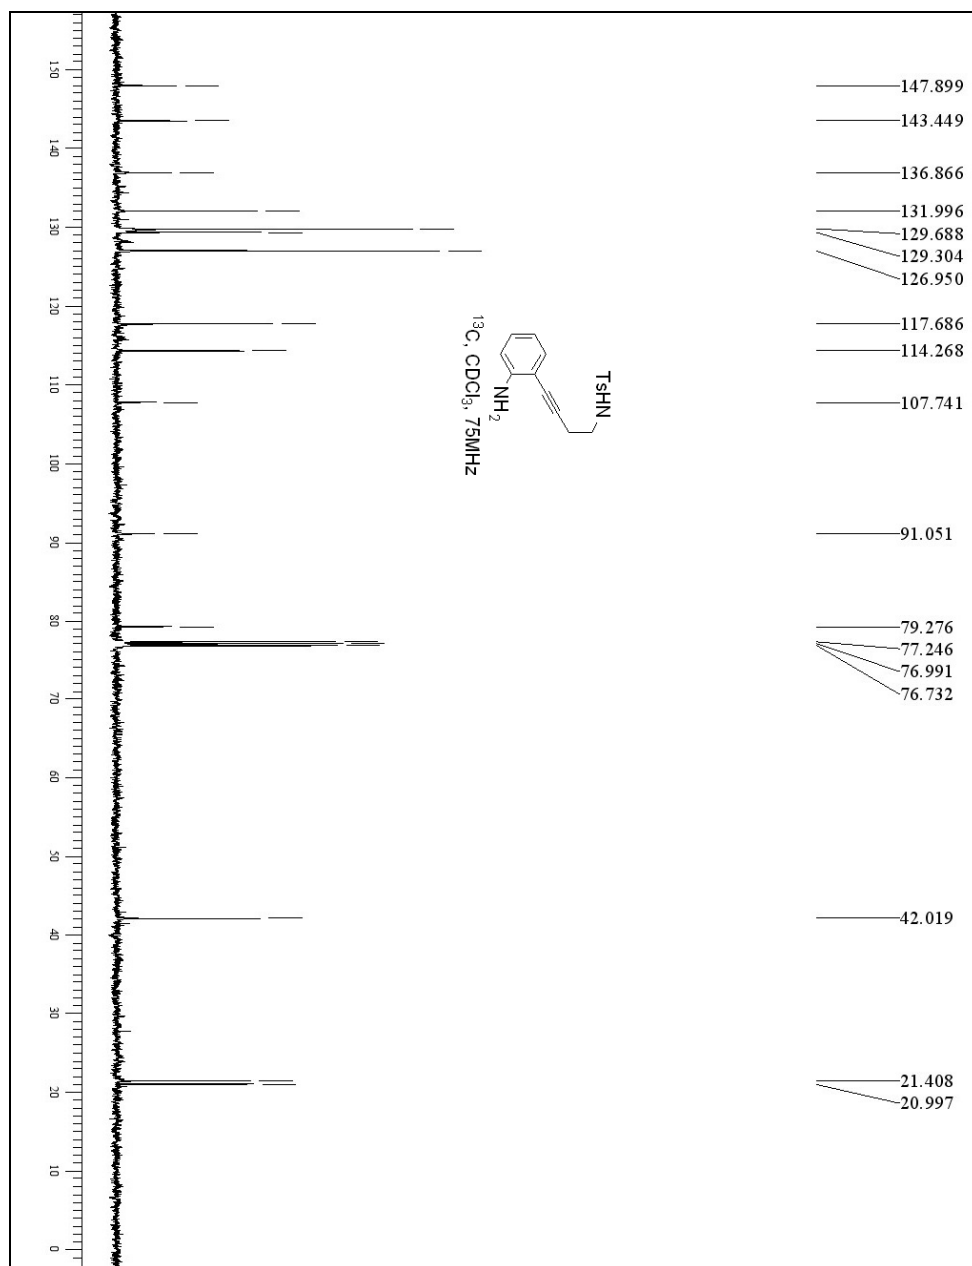

***N*-(4-(2-amino-5-methoxyphenyl)but-3-yn-1-yl)-4-methylbenzenesulfonamide:**

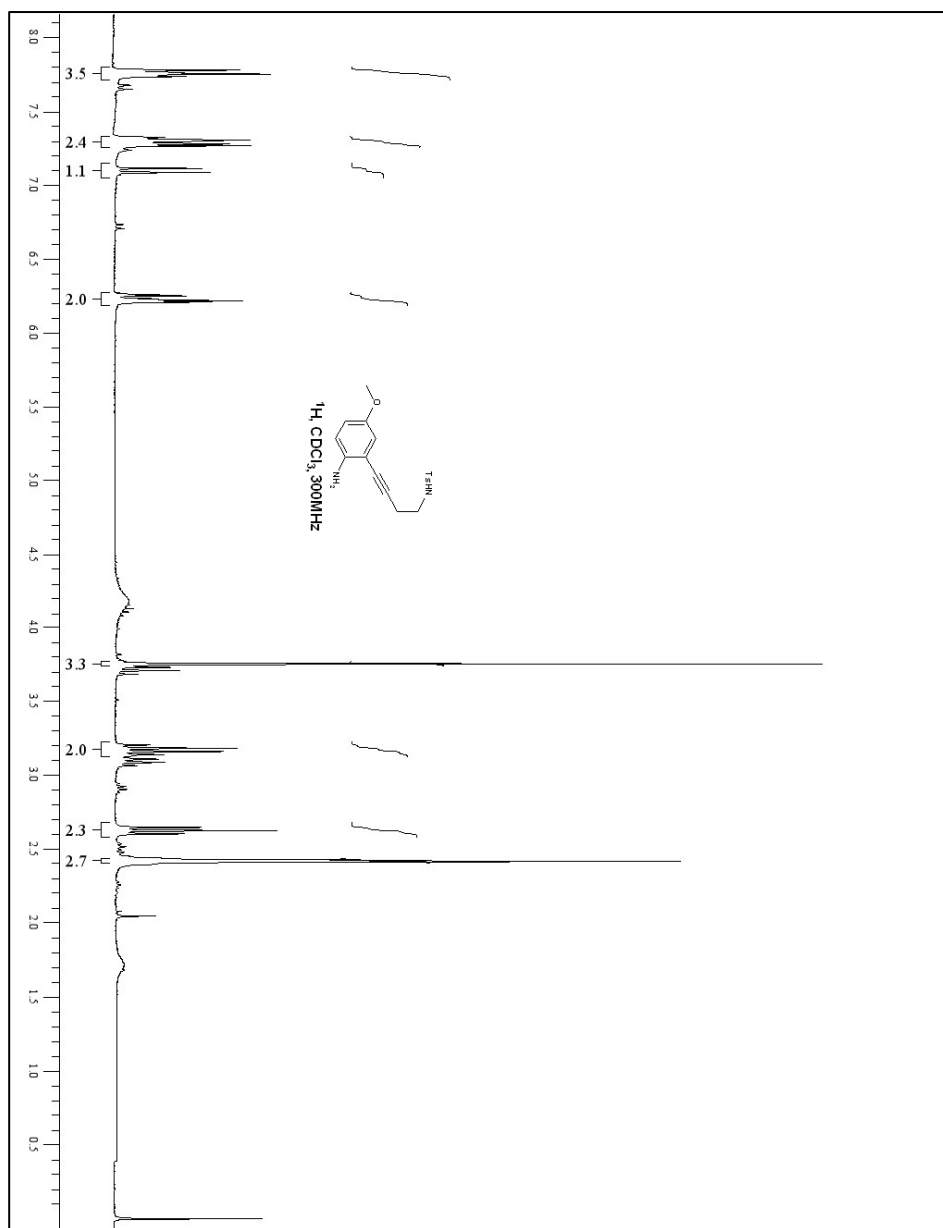



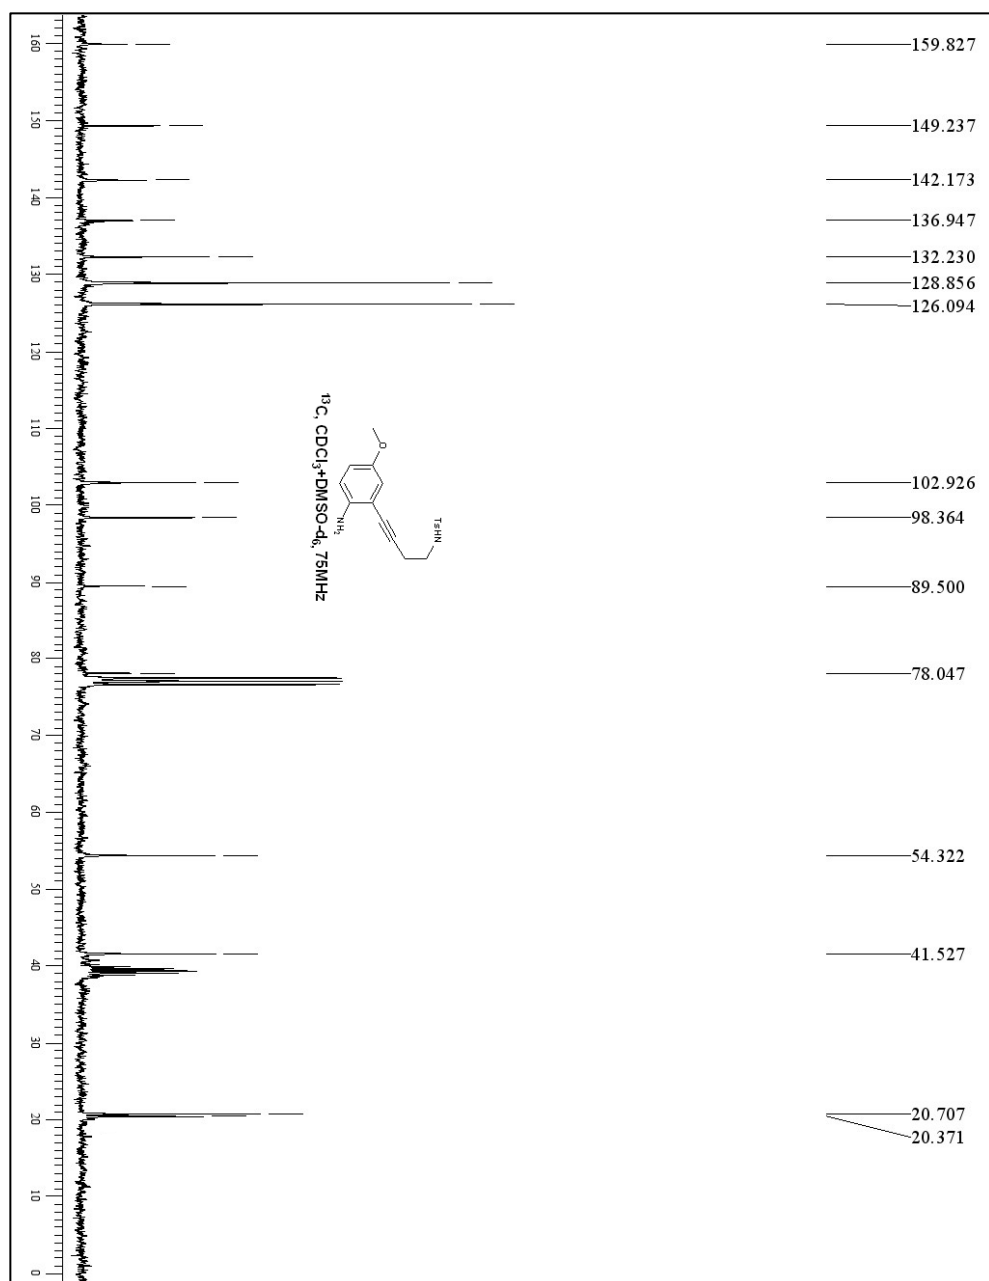

***N*-(2-(1H-indol-2-yl)ethyl)-4-methylbenzenesulfonamide (1c):**

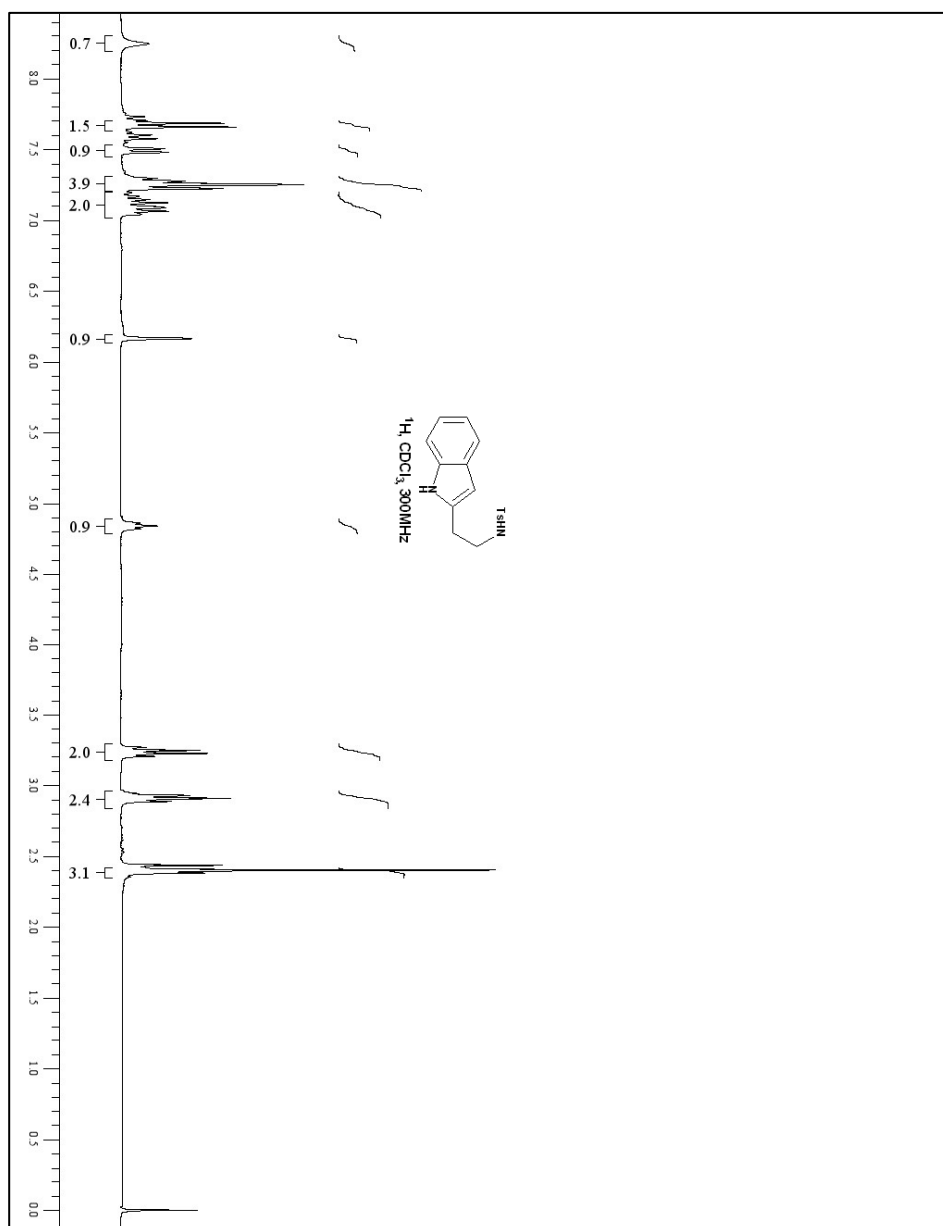

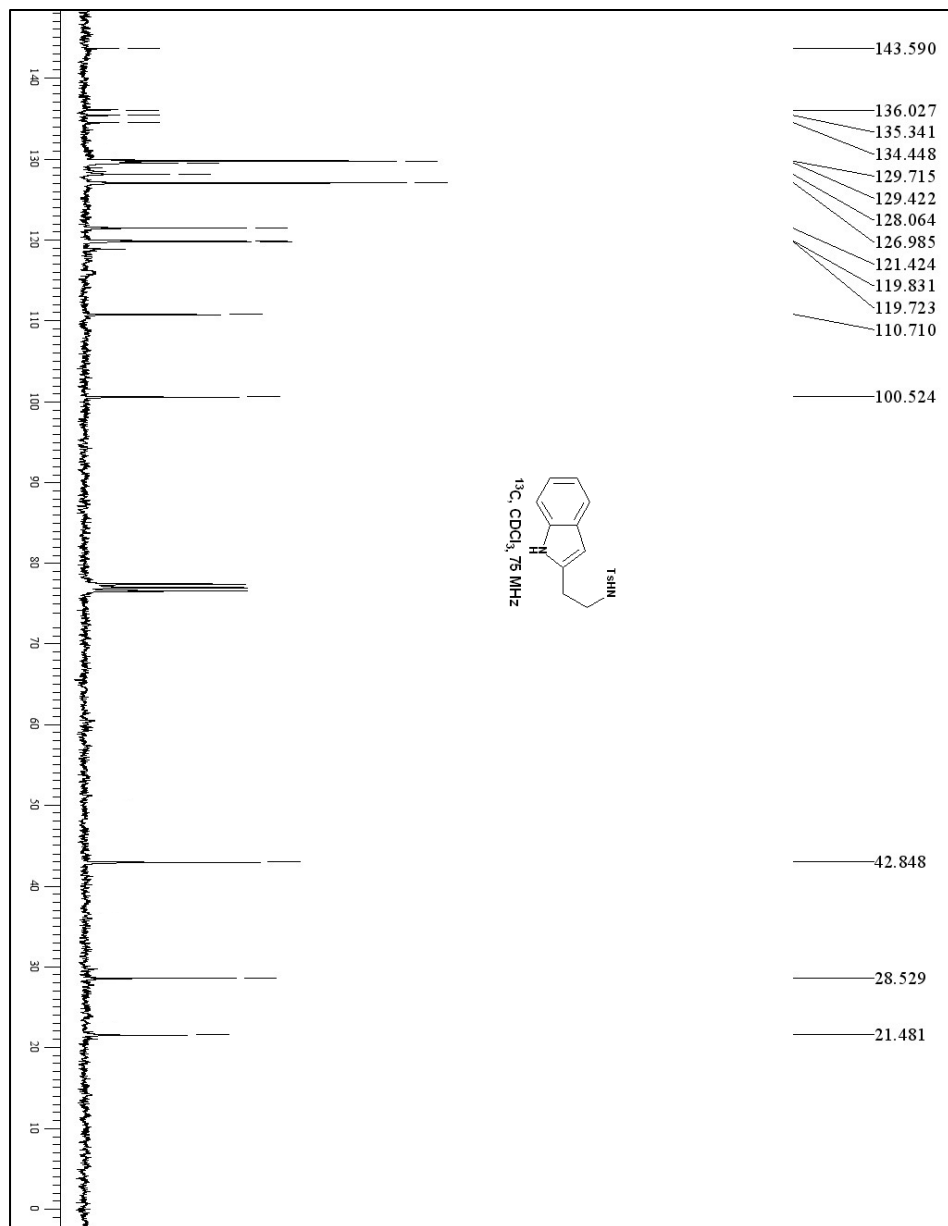



**1-(2-Bromophenyl)-2-tosyl-2,3,4,5-tetrahydro-1*H*-pyrido[4,3-*b*]indole (3b; Table 2; Entry b)**

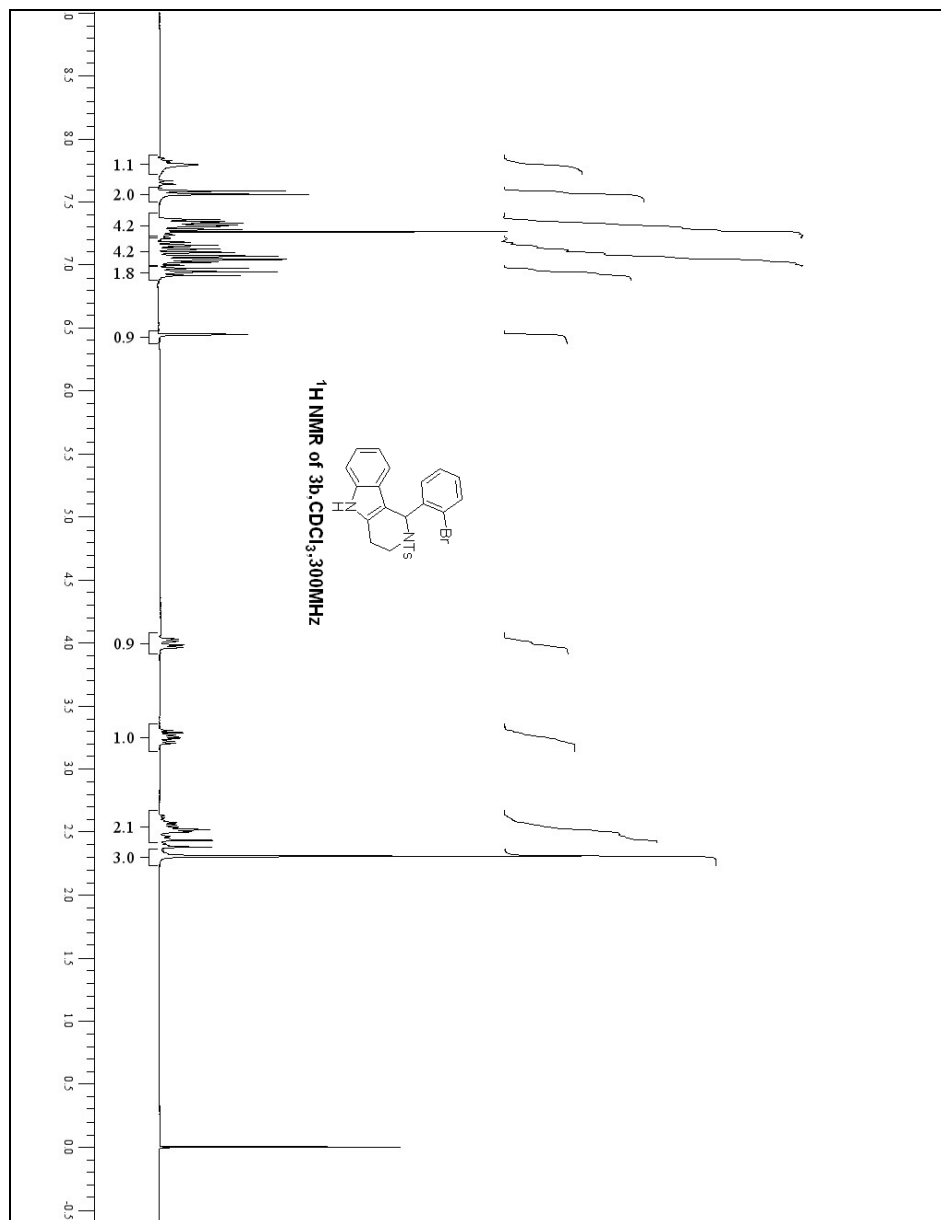

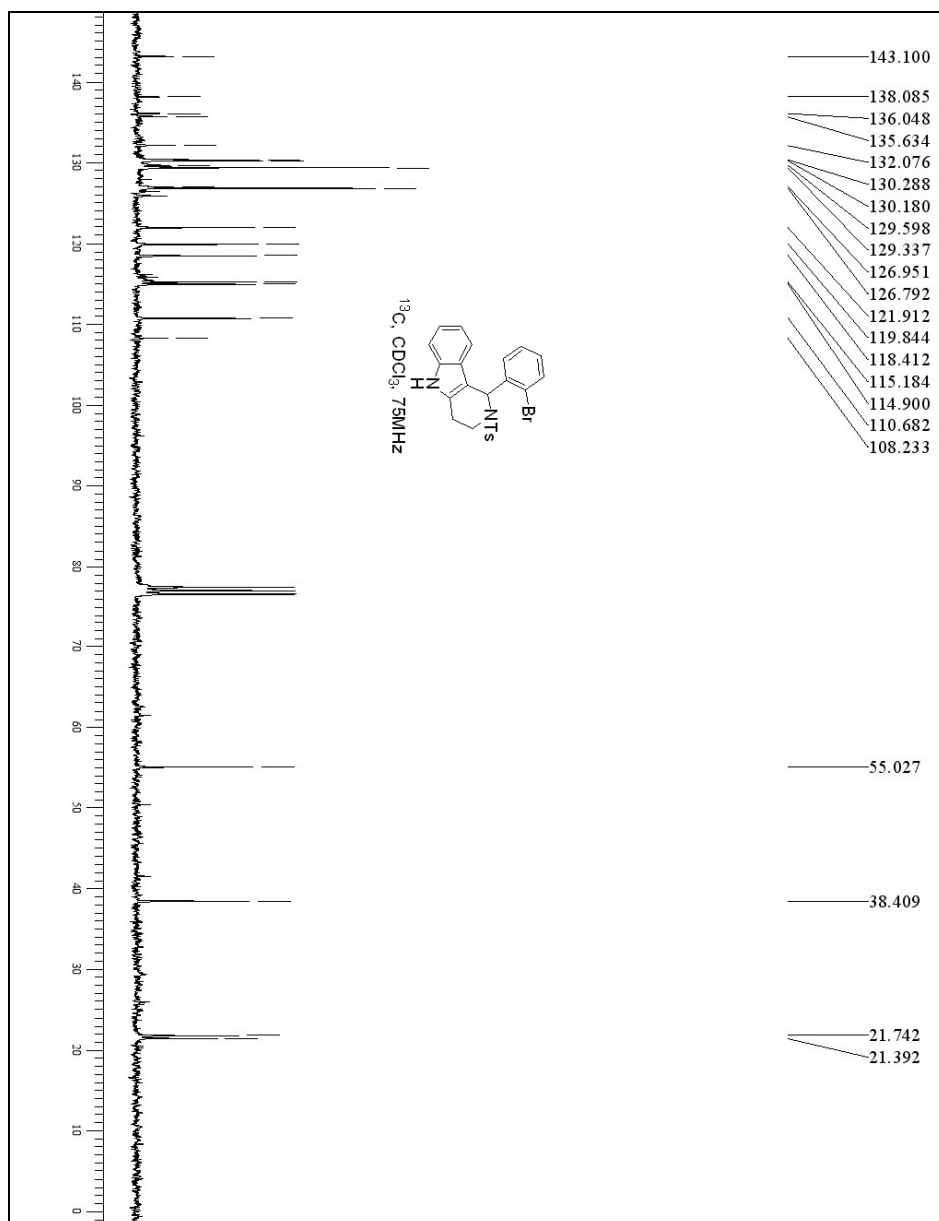

**1-(*o*-Tolyl)-2-tosyl-2,3,4,5-tetrahydro-1*H*-pyrido[4,3-*b*]indole (3c; Table 2; Entry c)**

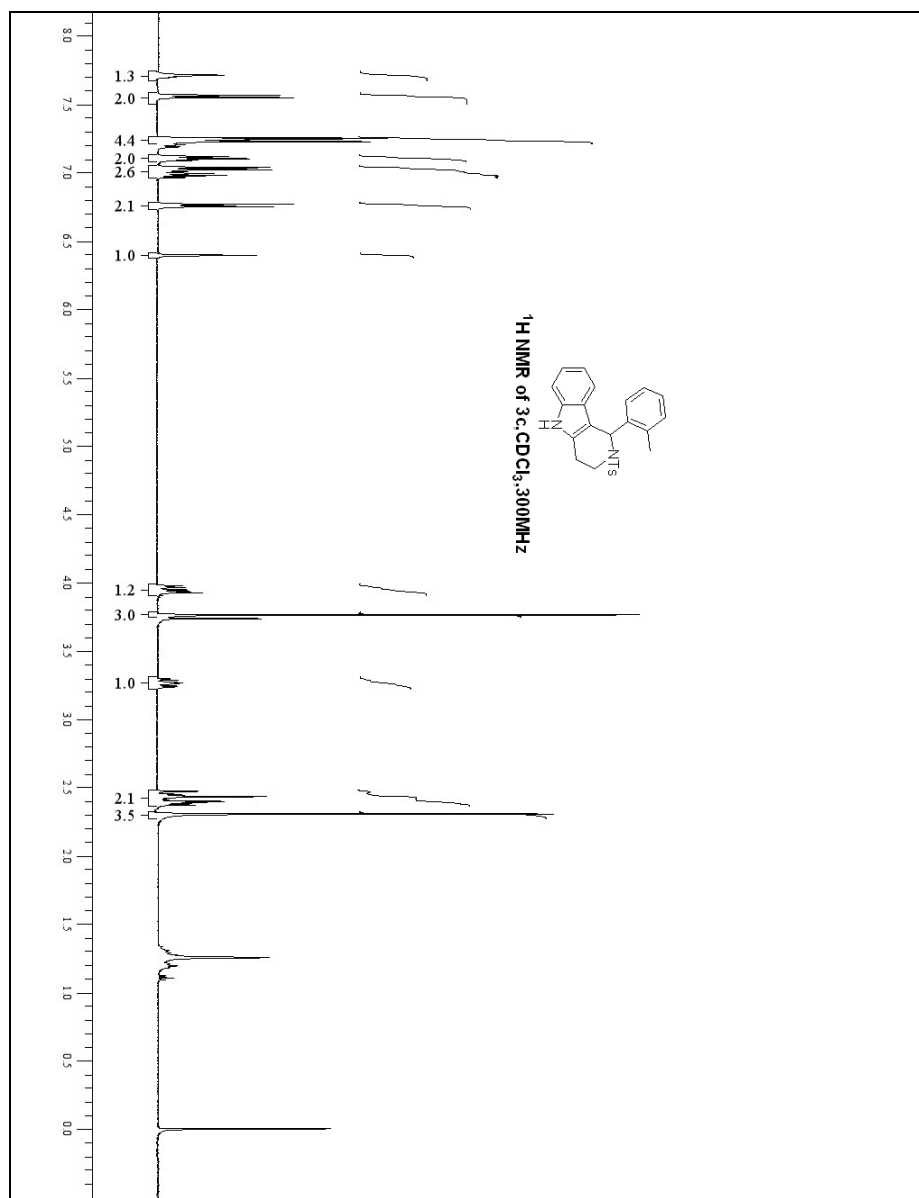

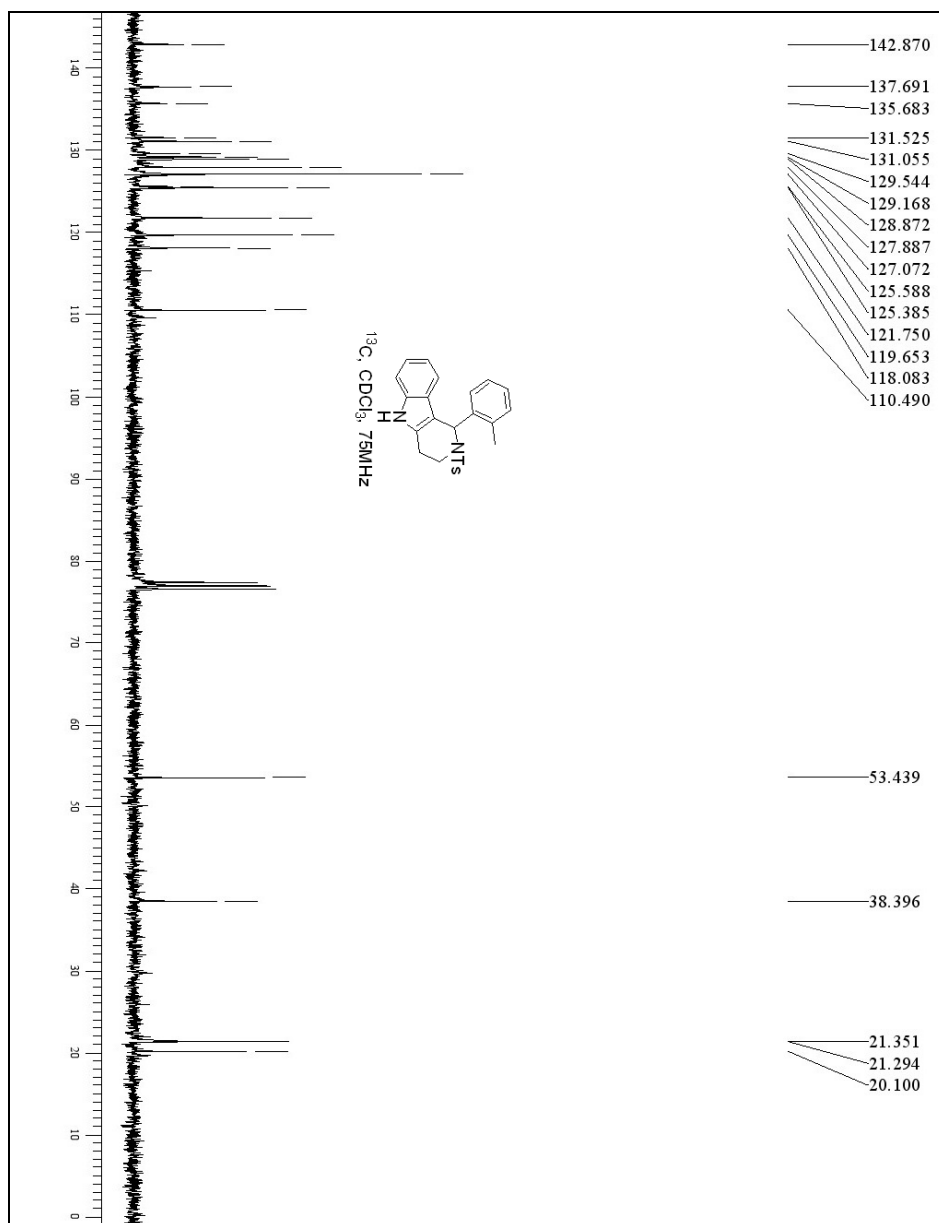



**1-(*p*-Tolyl)-2-tosyl-2,3,4,5-tetrahydro-1*H*-pyrido[4,3-*b*]indole (3d; Table 2; Entry d)**

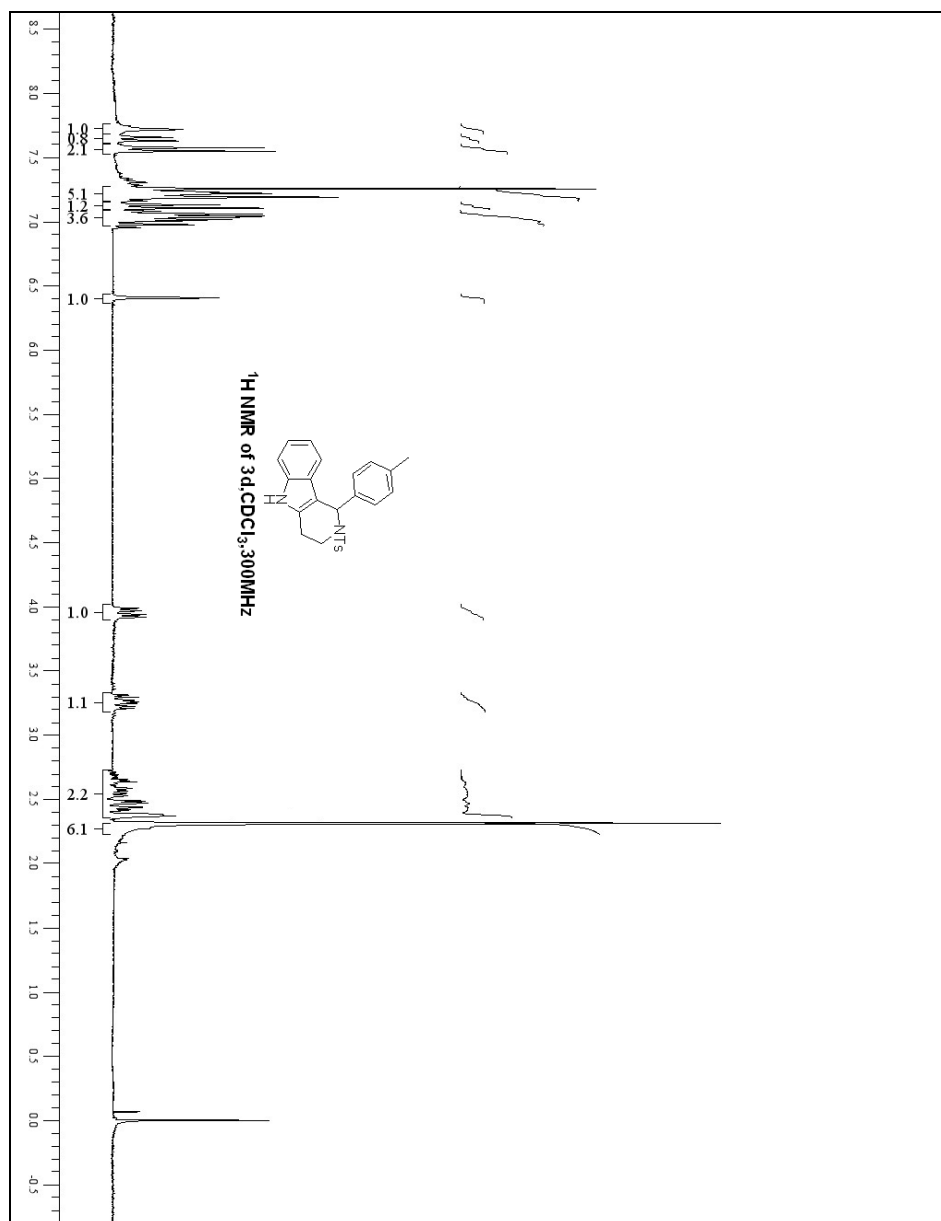

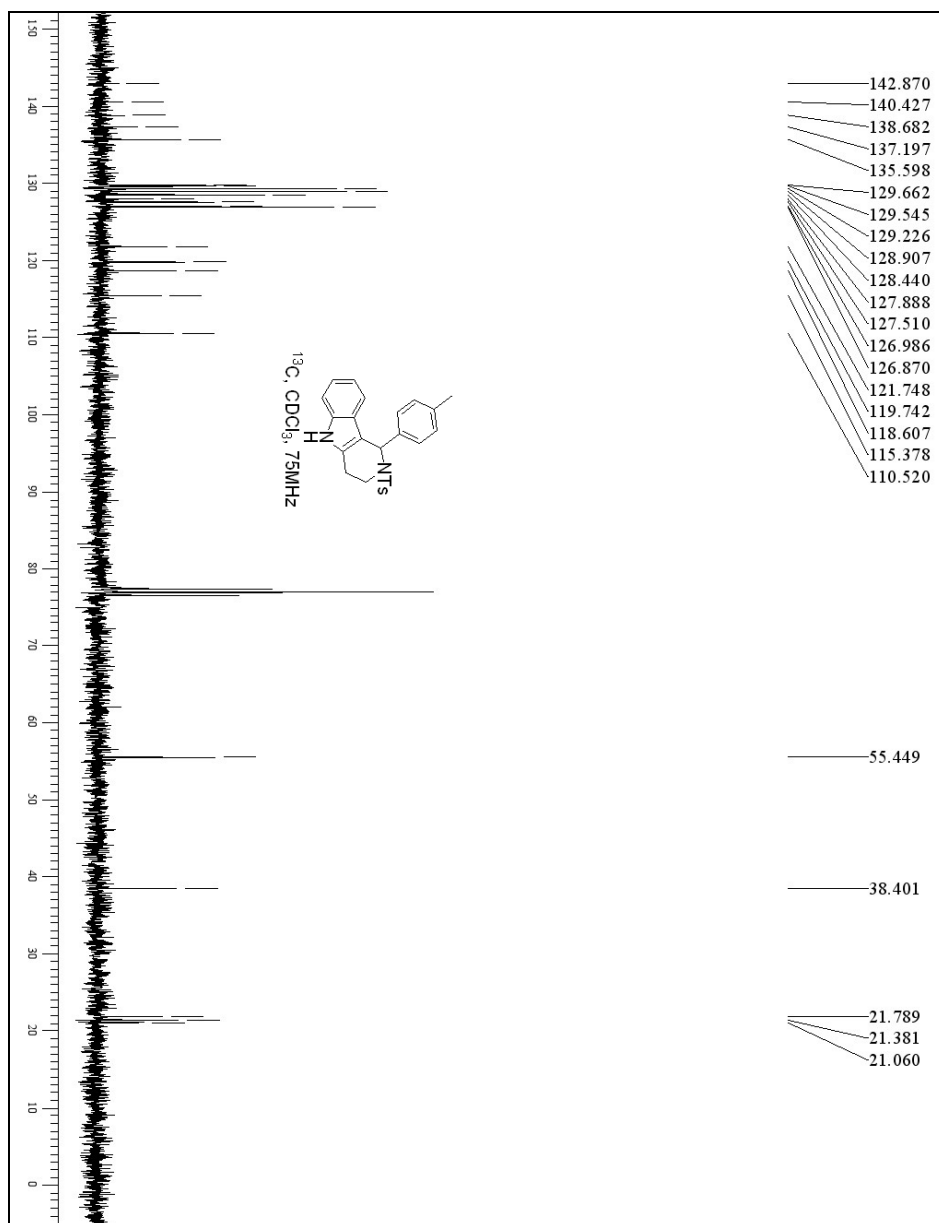

**1-(4-Methoxyphenyl)-2-tosyl-2,3,4,5-tetrahydro-1*H*-pyrido[4,3-*b*]indole (3e; Table 2; Entry e)**

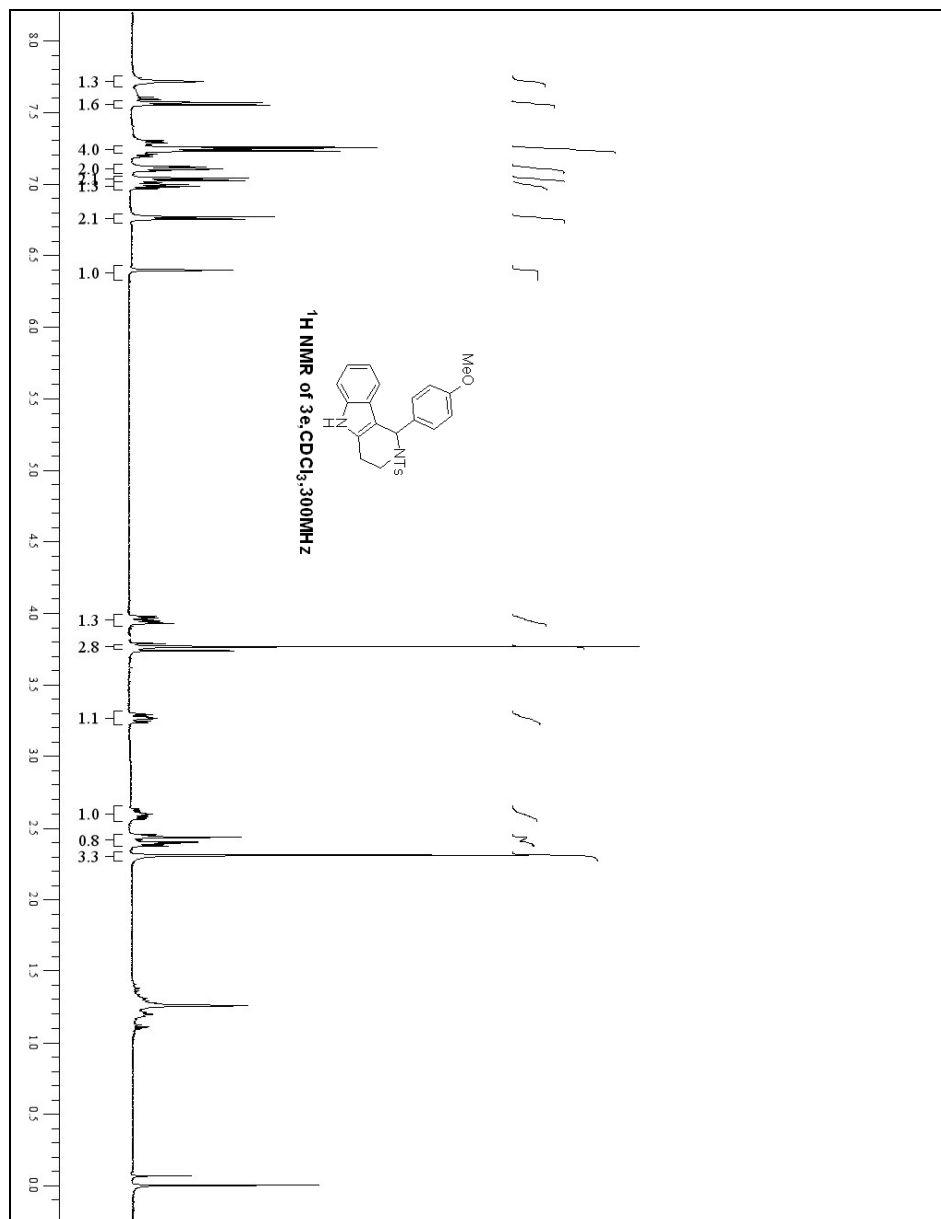

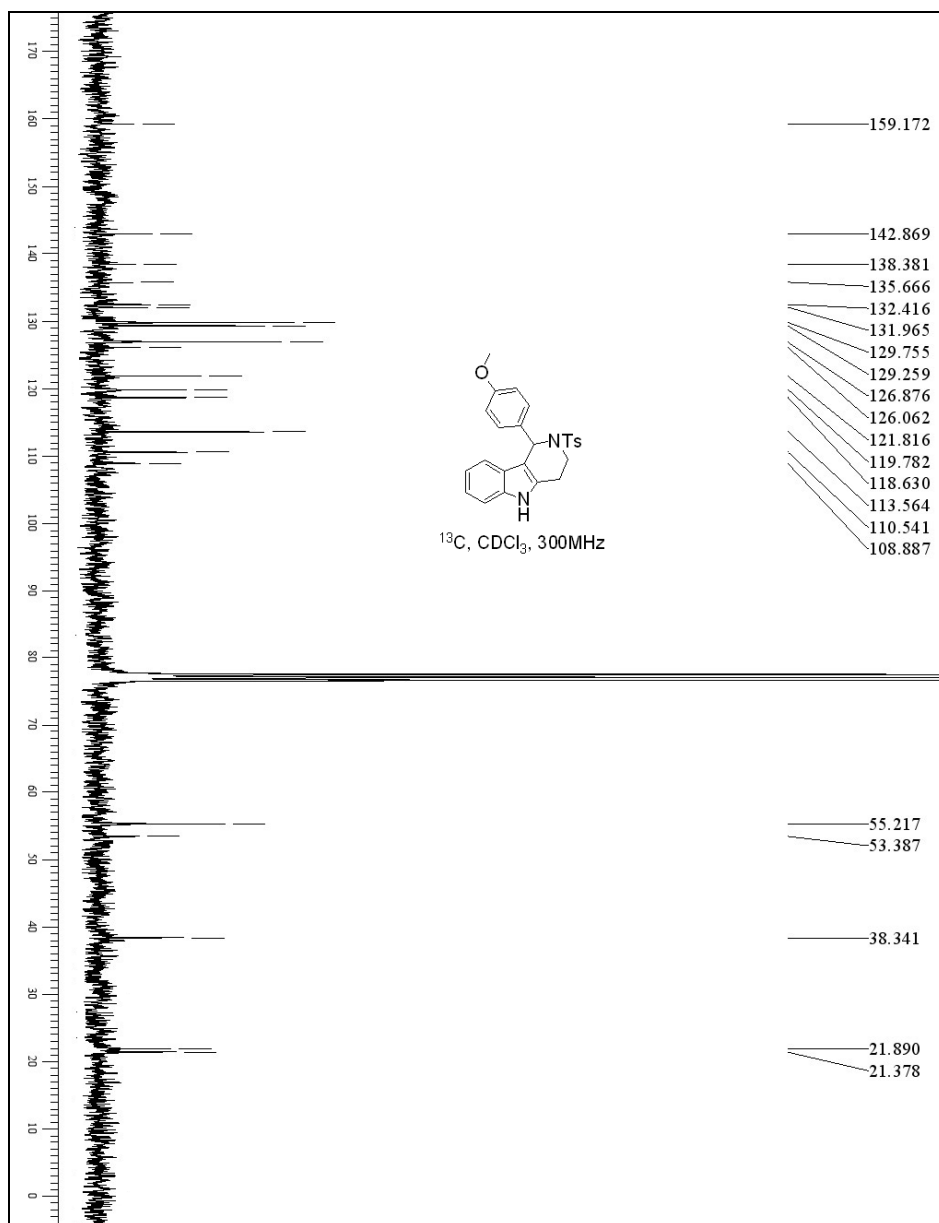

**1-Phenyl-2-tosyl-2,3,4,5-tetrahydro-1*H*-pyrido[4,3-*b*]indole (3f; Table 2; Entry f)**

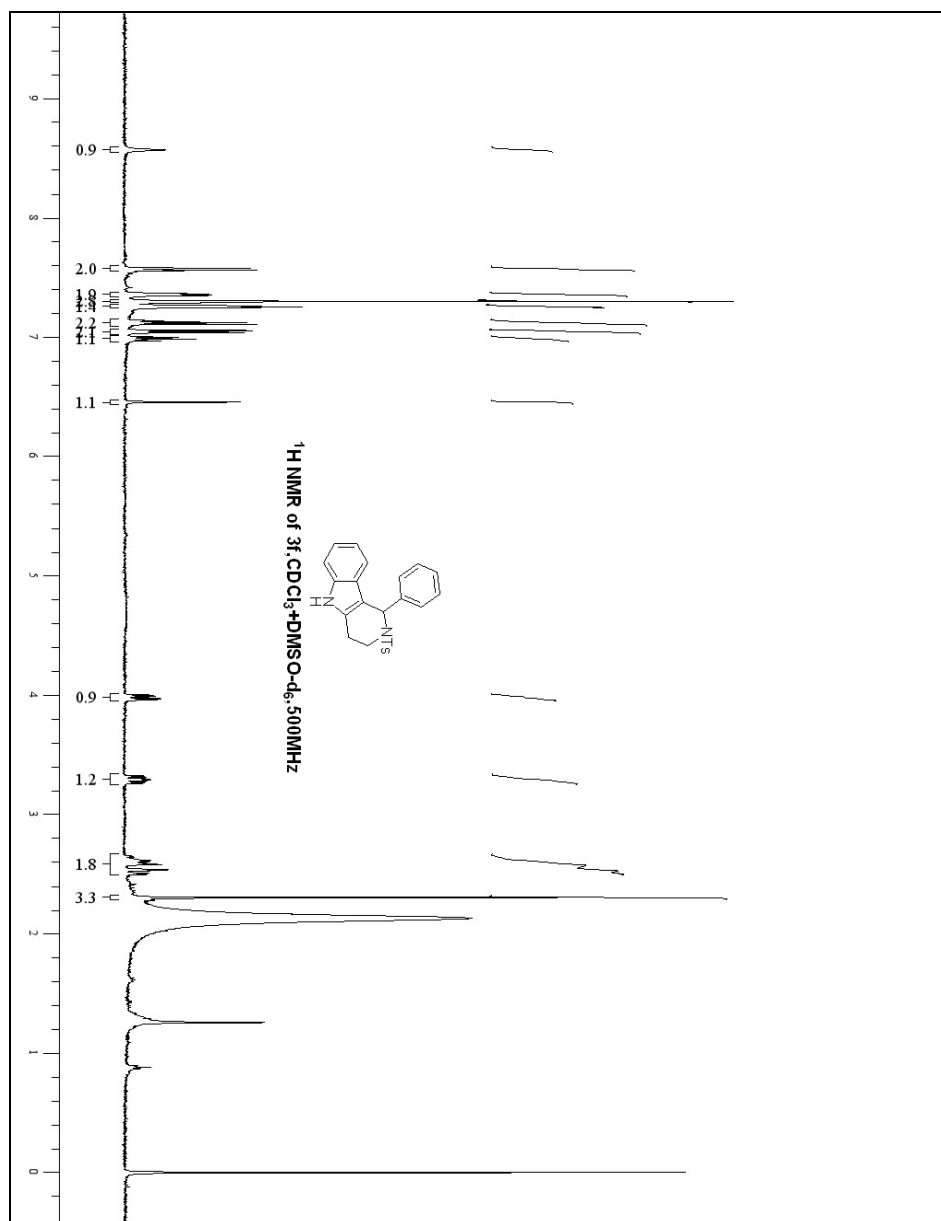

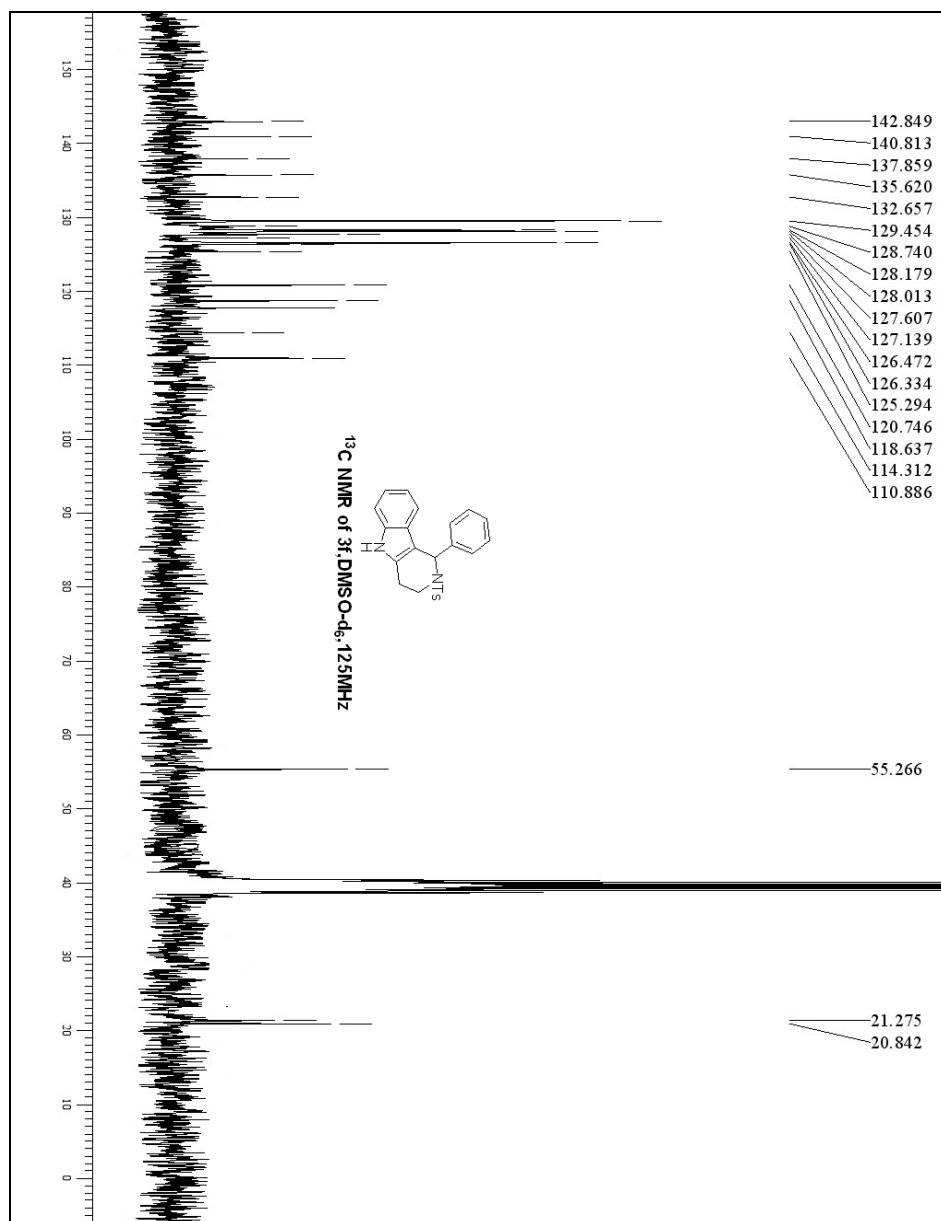

**1-(4-Fluorophenyl)-2-tosyl-2,3,4,5-tetrahydro-1*H*-pyrido[4,3-*b*]indole (3g; Table 2; Entry g)**

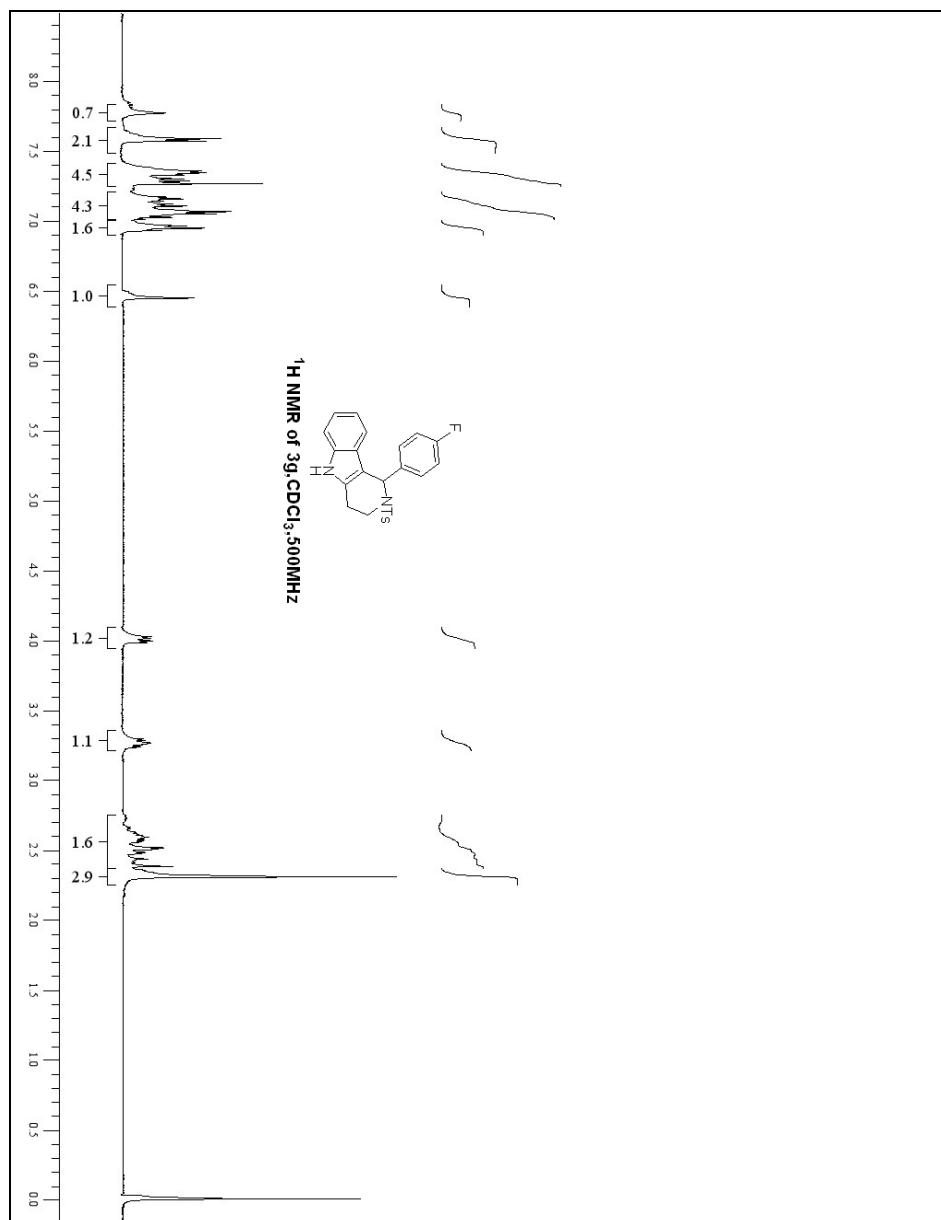

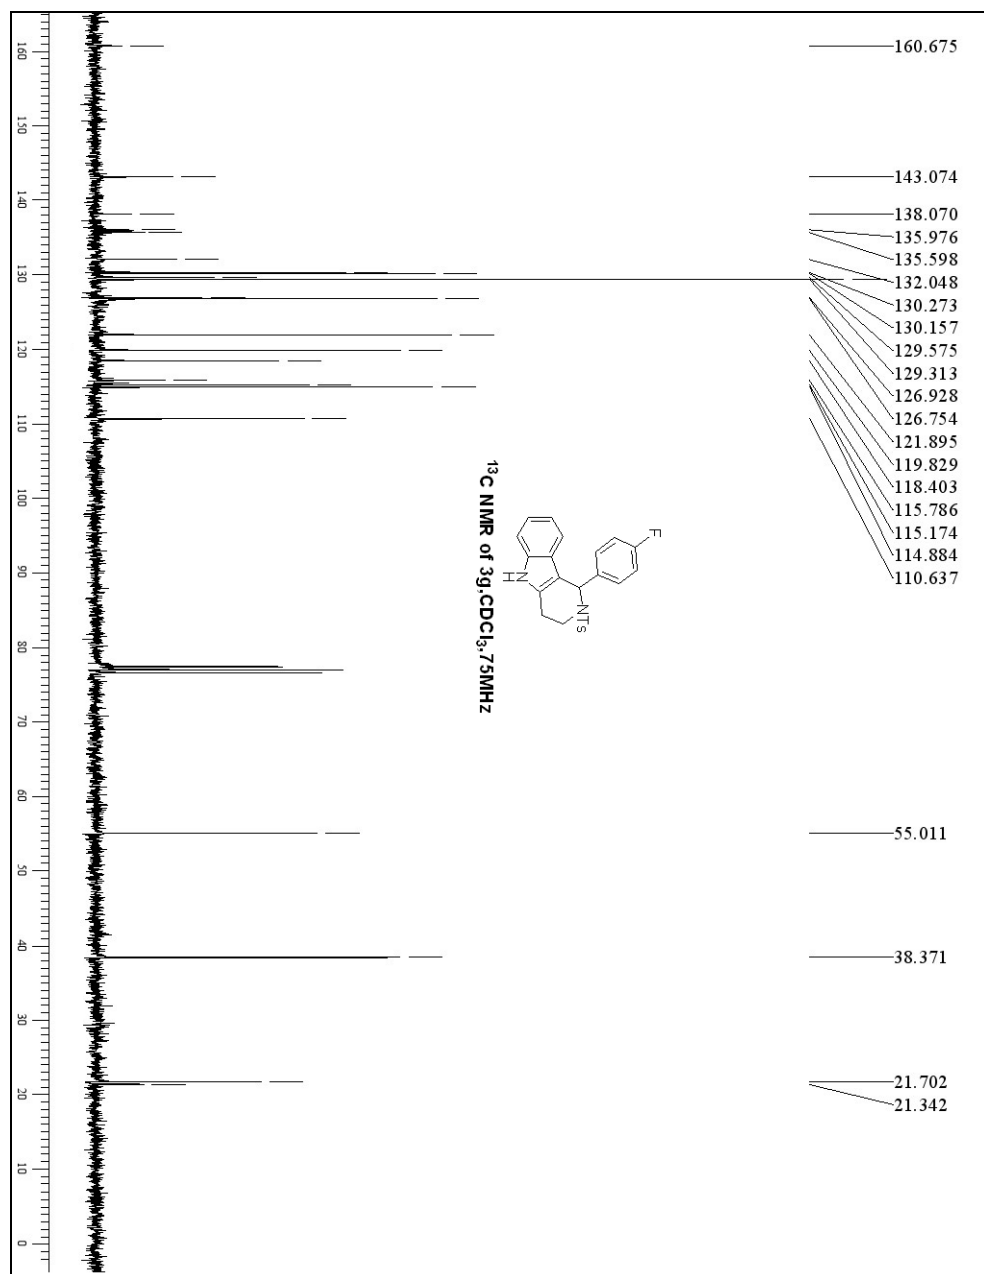



**1-(2-Fluorophenyl)-2-tosyl-2,3,4,5-tetrahydro-1*H*-pyrido[4,3-*b*]indole (3h; Table 2; Entry h)**

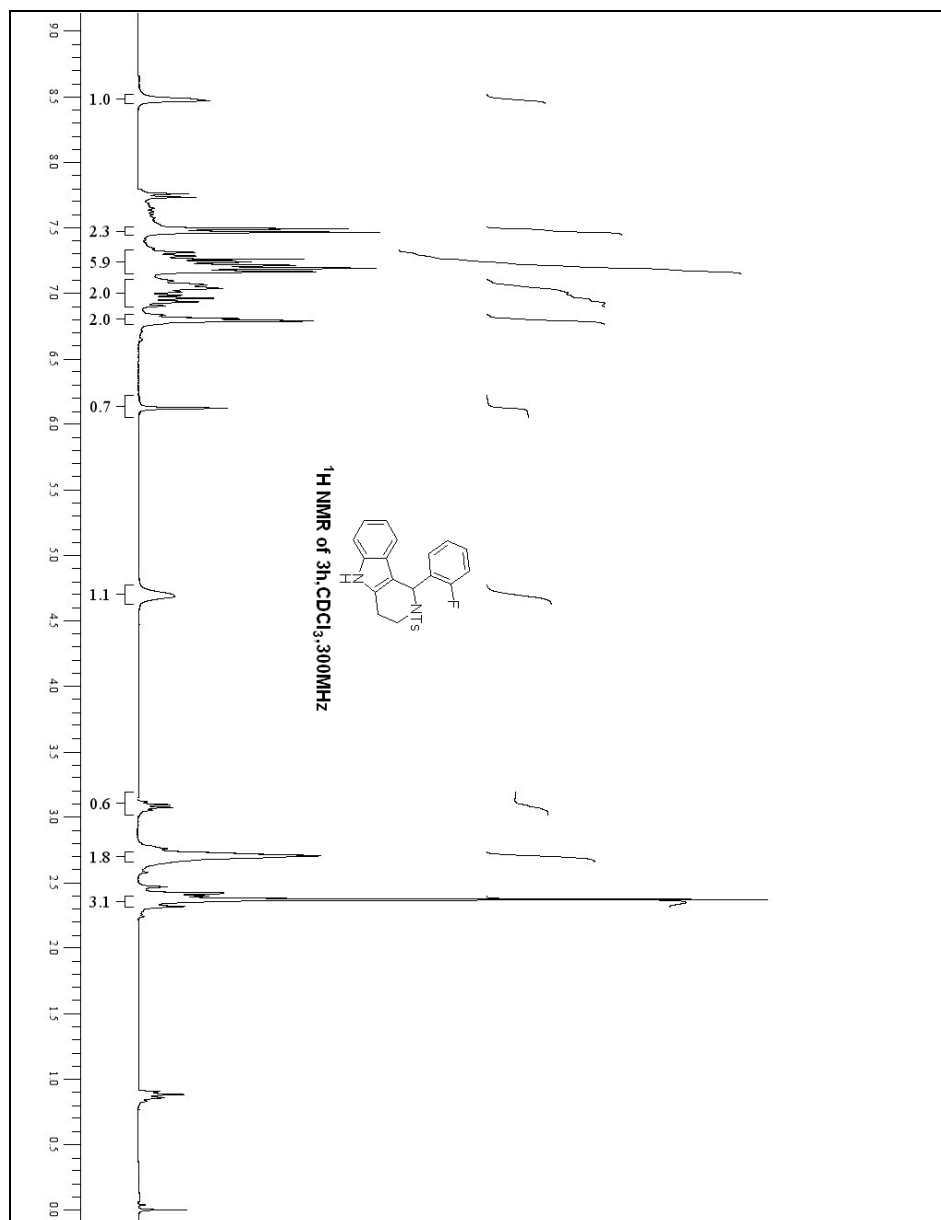

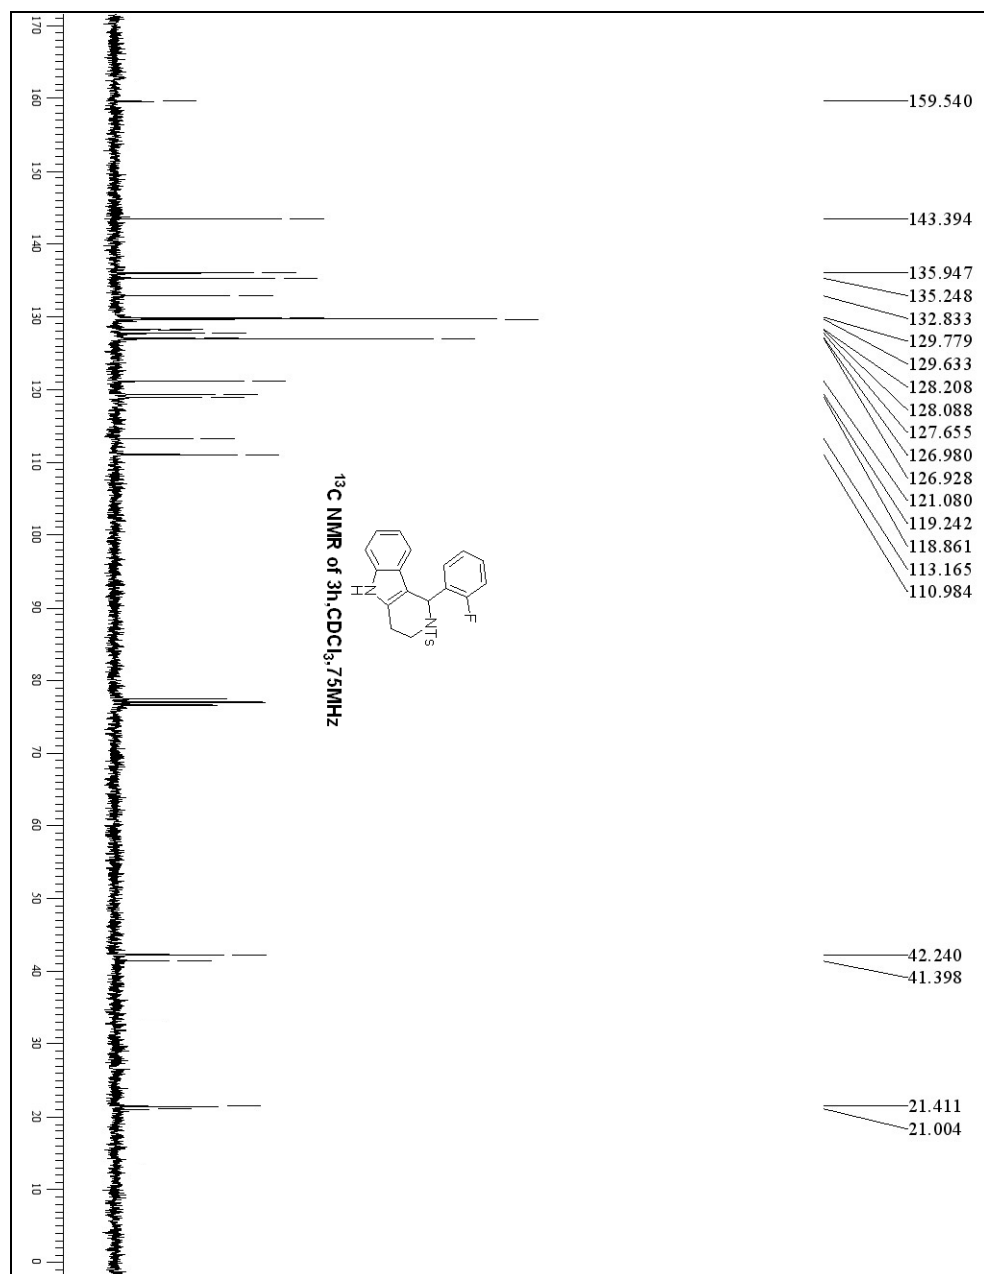

**1-(4-Nitrophenyl)-2-tosyl-2,3,4,5-tetrahydro-1*H*-pyrido[4,3-*b*]indole (3i; Table 2; Entry i).**

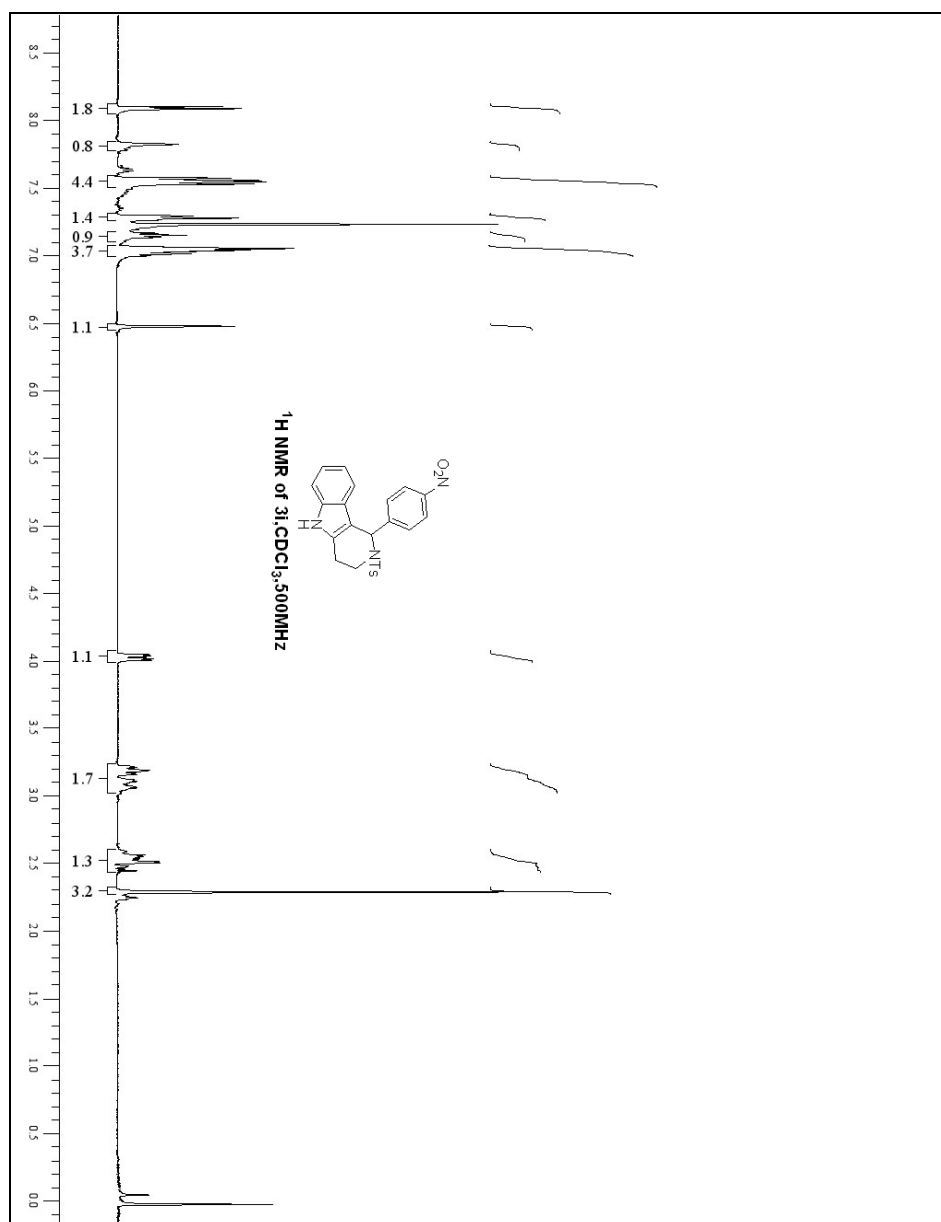

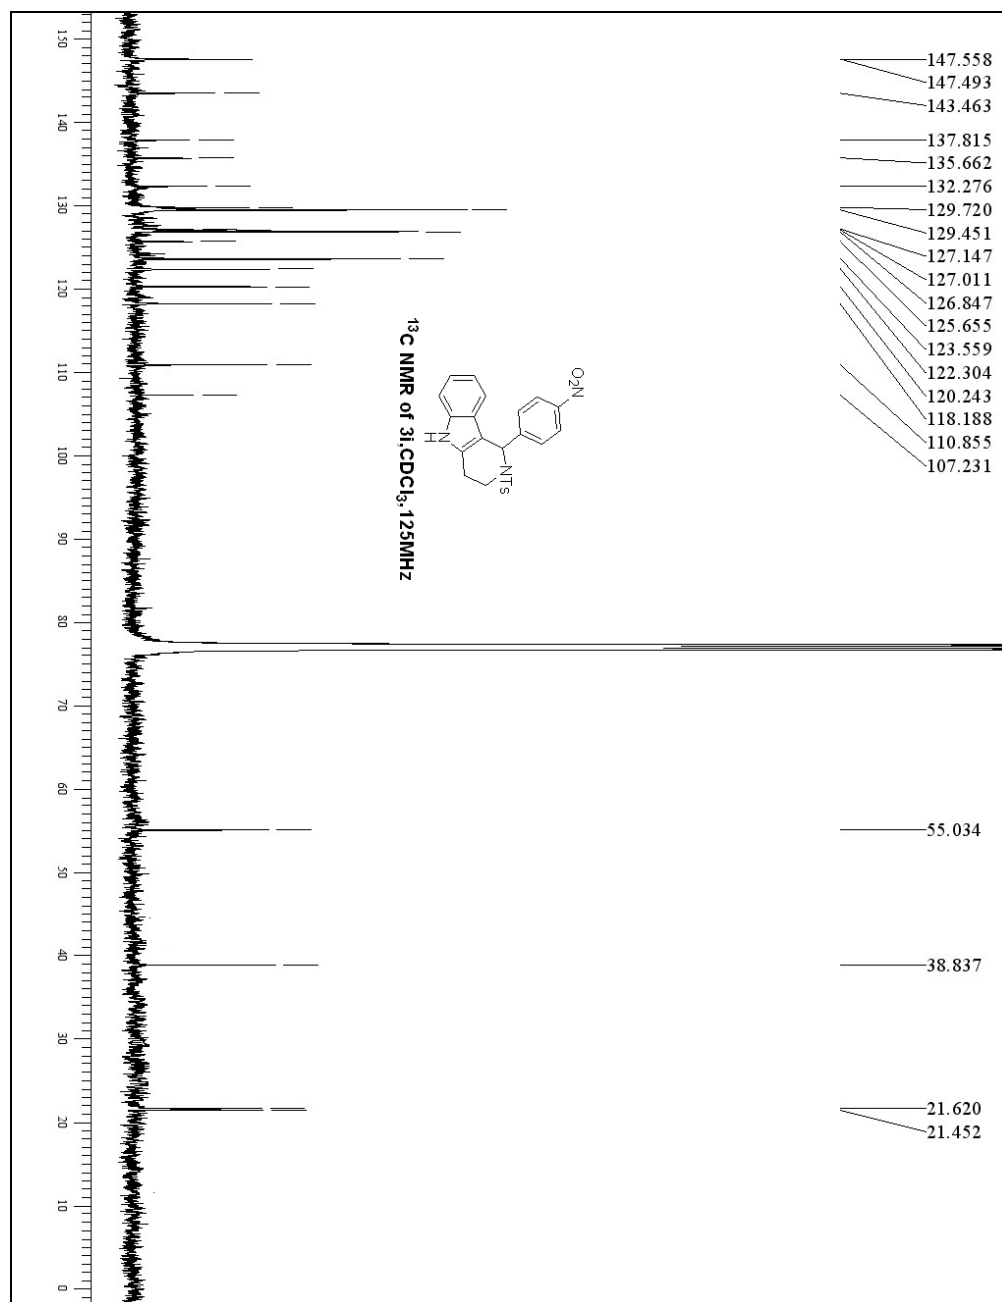

**1-(4-Chlorophenyl)-2-tosyl-2,3,4,5-tetrahydro-1*H*-pyrido[4,3-*b*]indole (3j; Table 2; Entry j)**

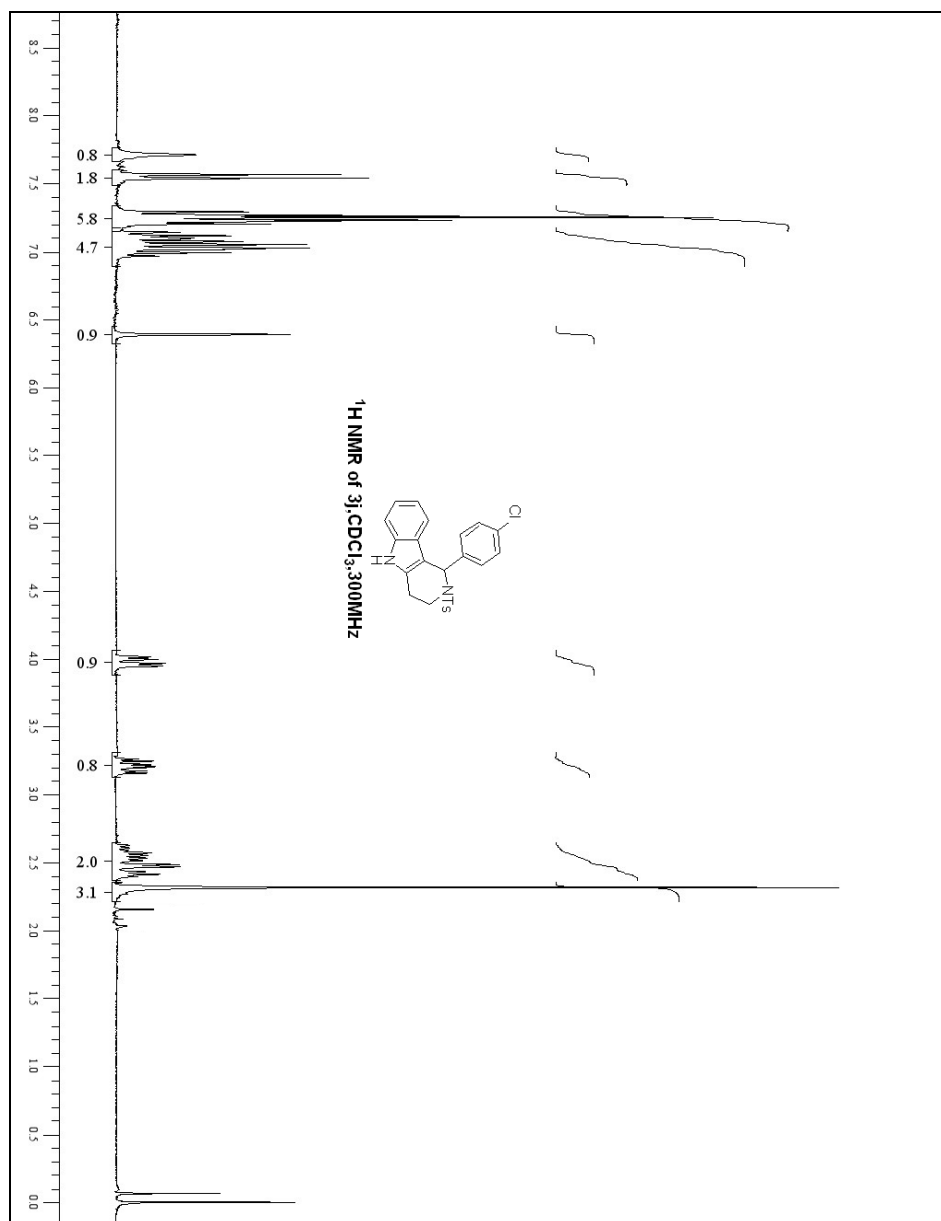

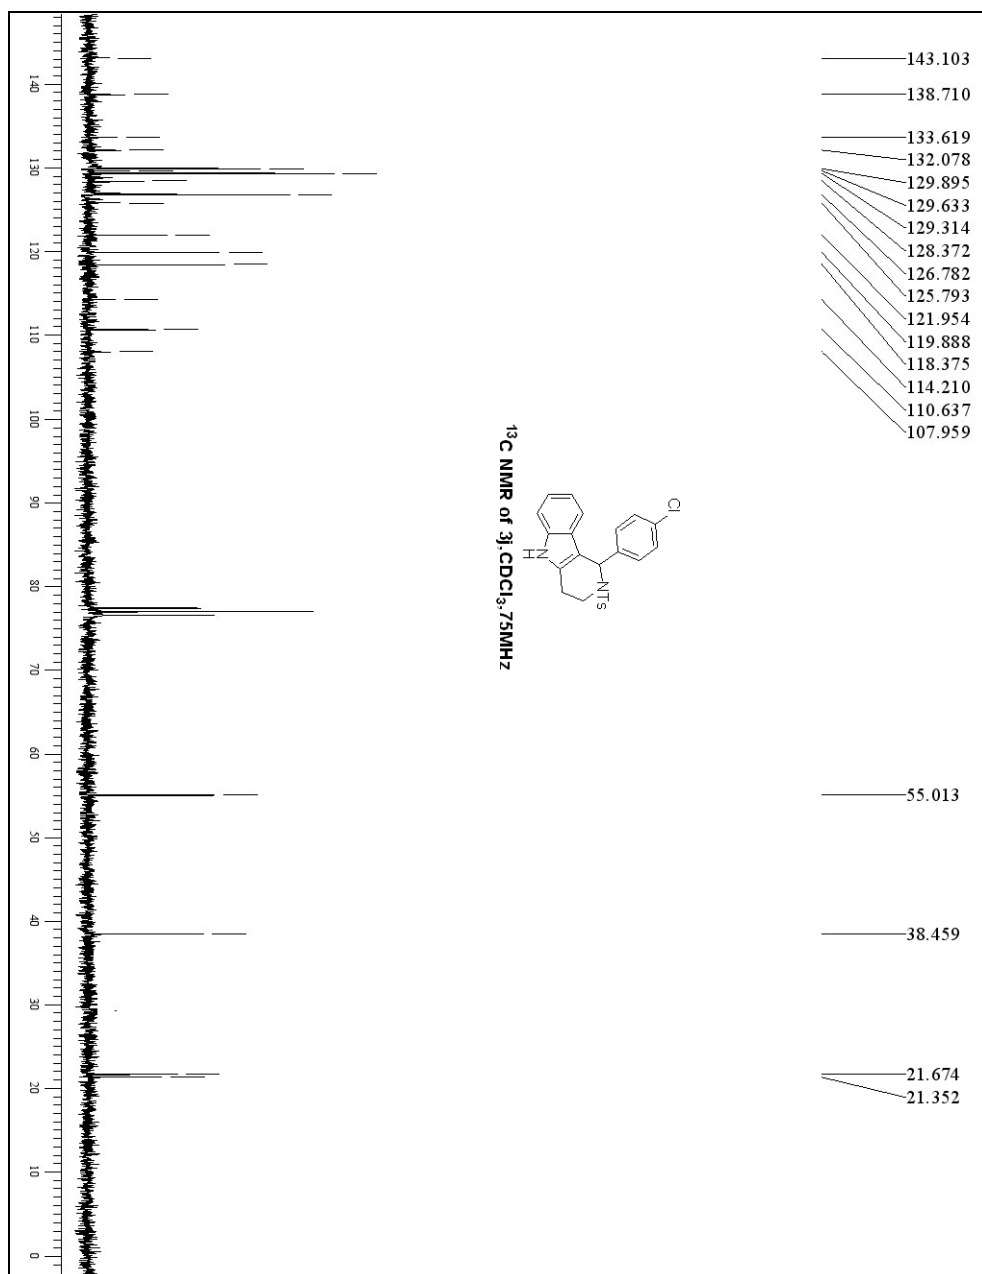

**1-(3,4-Dimethoxyphenyl)-2-tosyl-2,3,4,5-tetrahydro-1*H*-pyrido[4,3-*b*]indole (3k; Table 2;  
Entry k)**

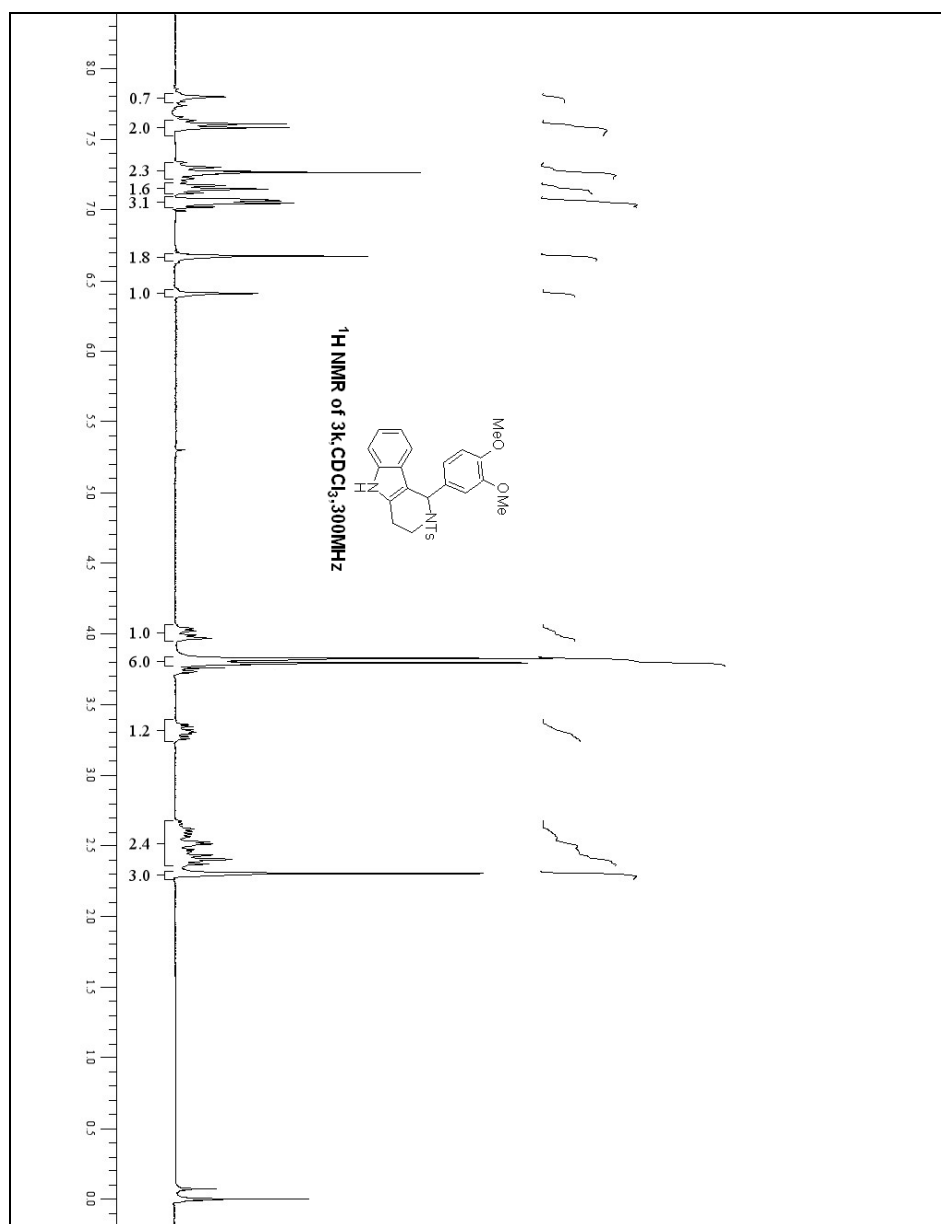

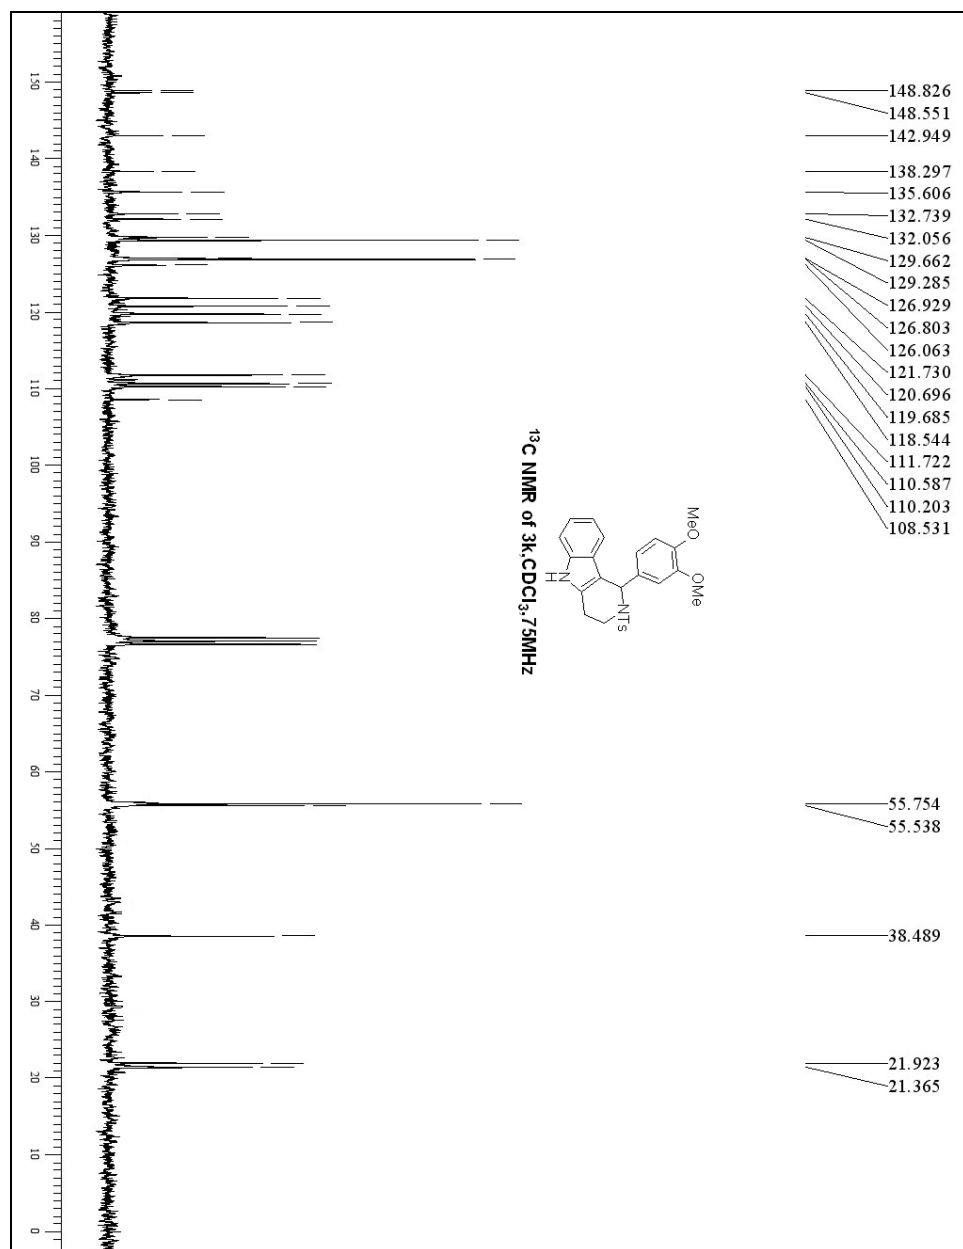



**1-(3,5-Dimethylphenyl)-2-tosyl-2,3,4,5-tetrahydro-1*H*-pyrido[4,3-*b*]indole (3l; Table 2;**

**Entry I)**

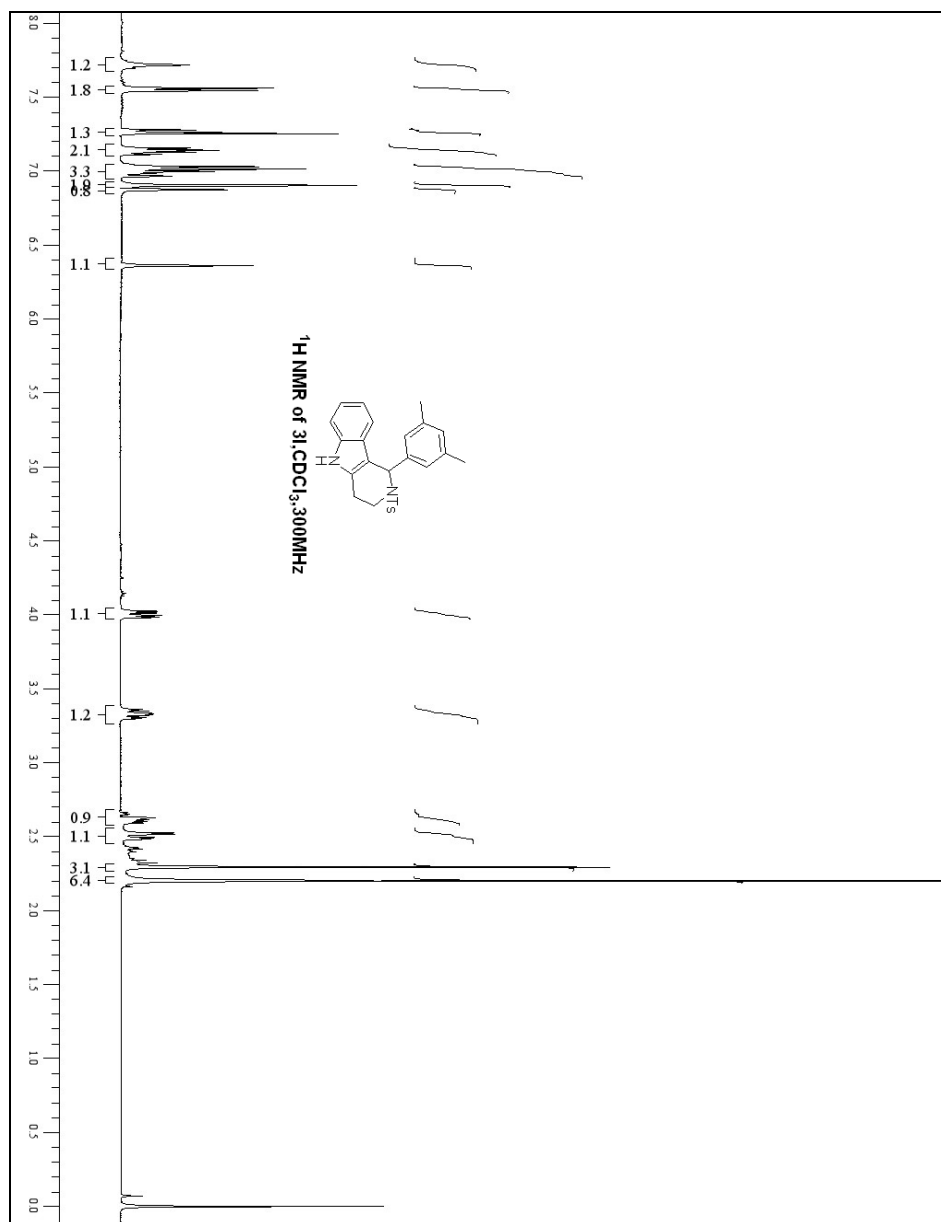

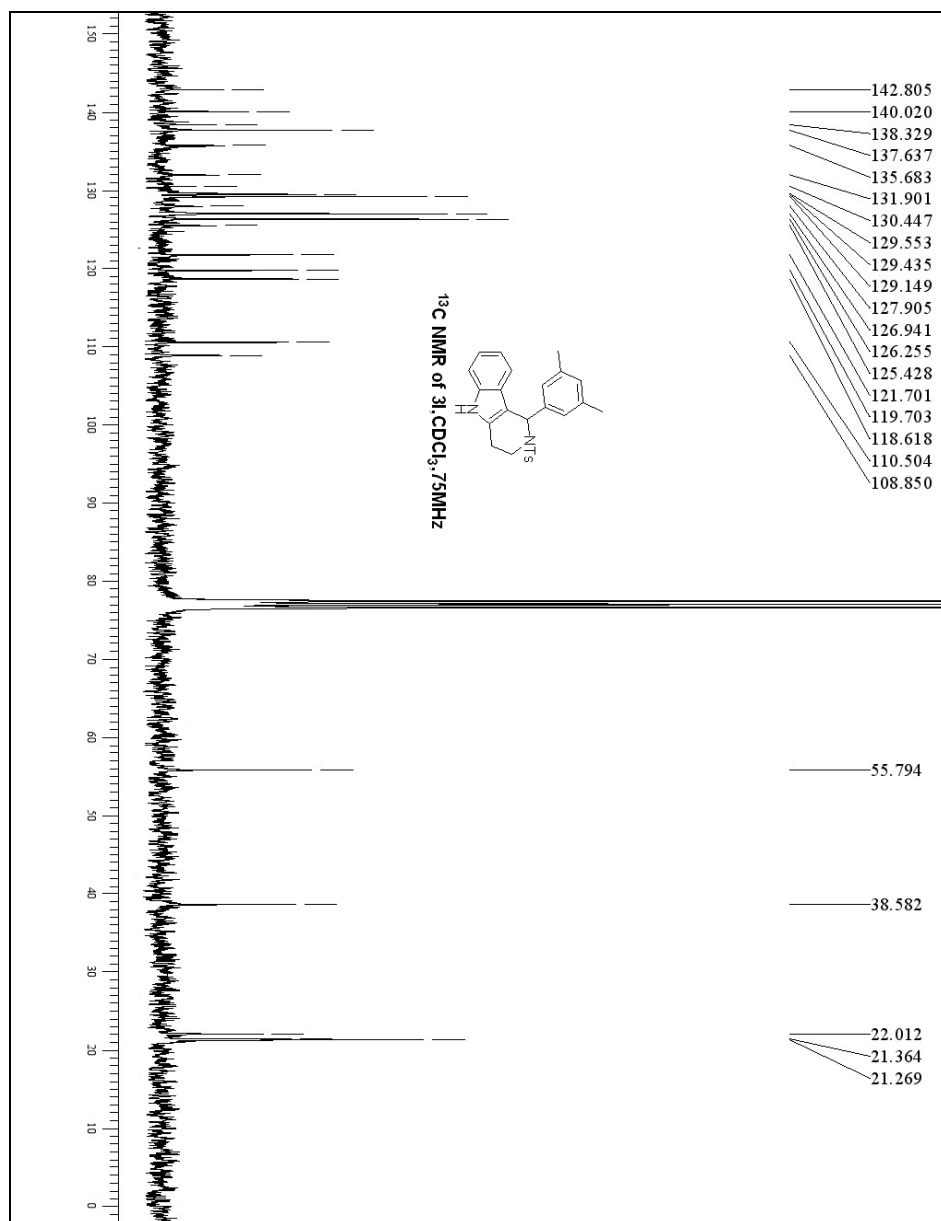

**2-Bromo-4-(2-tosyl-2,3,4,5-tetrahydro-1*H*-pyrido[4,3-*b*]indol-1-yl)phenol (3m; Table 2;**

**Entry m)**

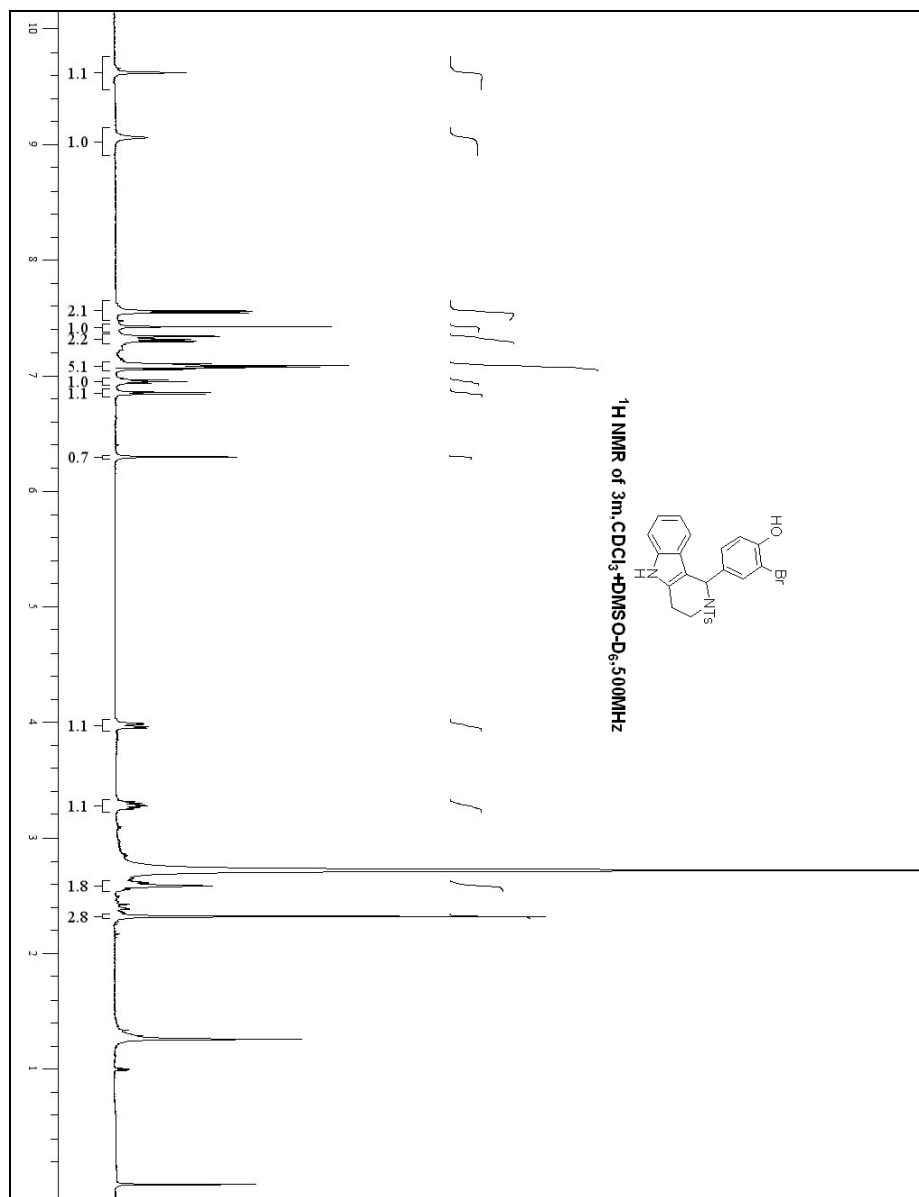

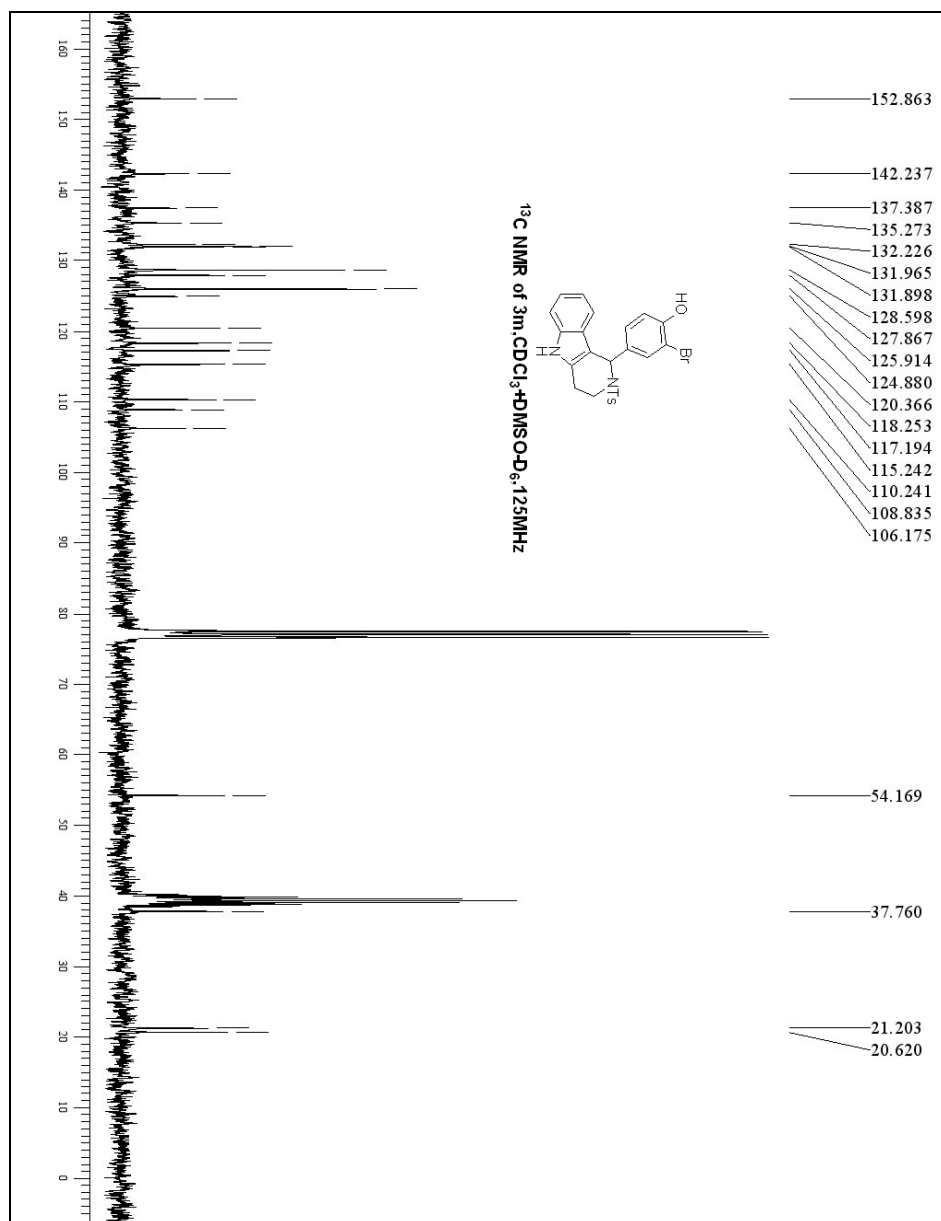

1-(2,4-Dichlorophenyl)-2-tosyl-2,3,4,5-tetrahydro-1*H*-pyrido[4,3-*b*]indole (3n; Table 2; Entry n)

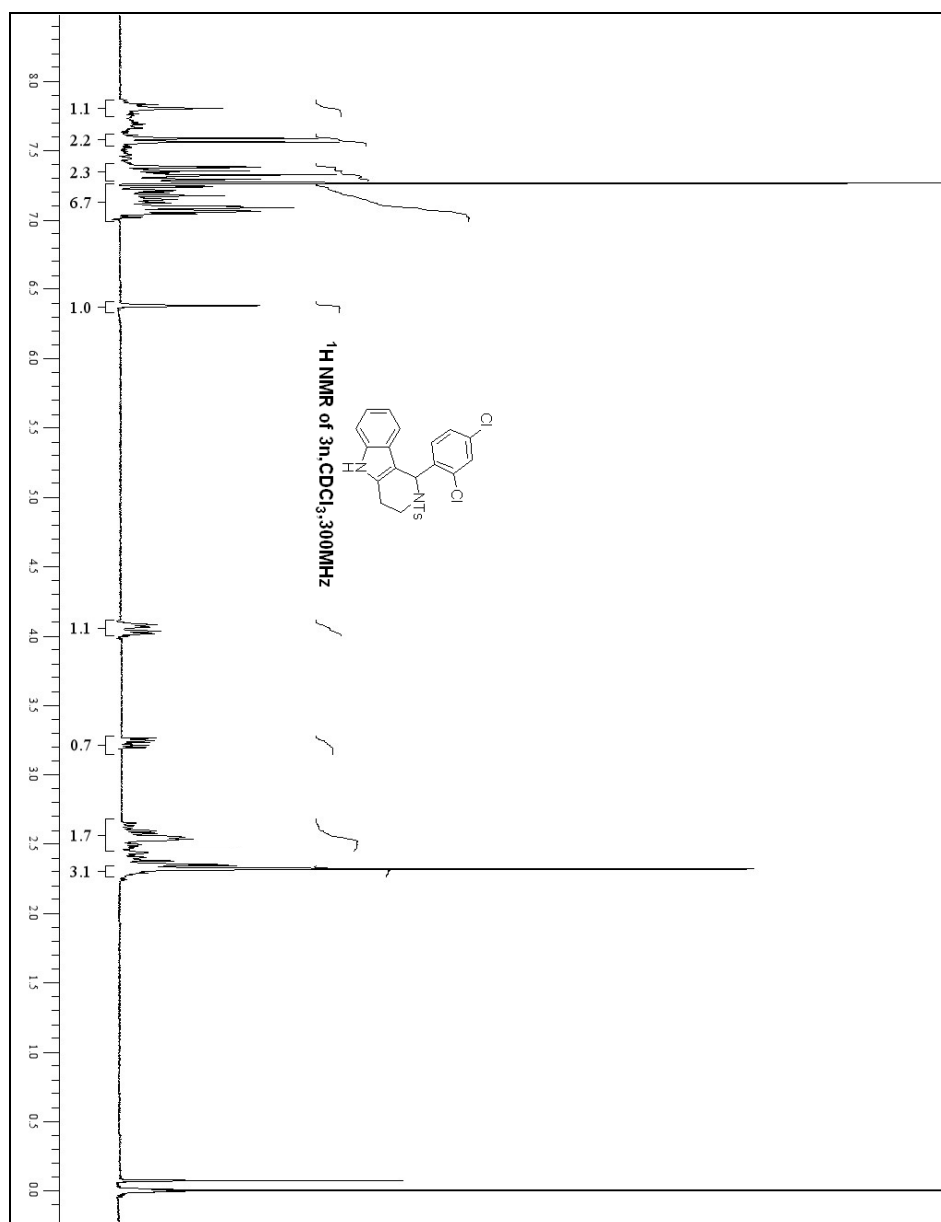

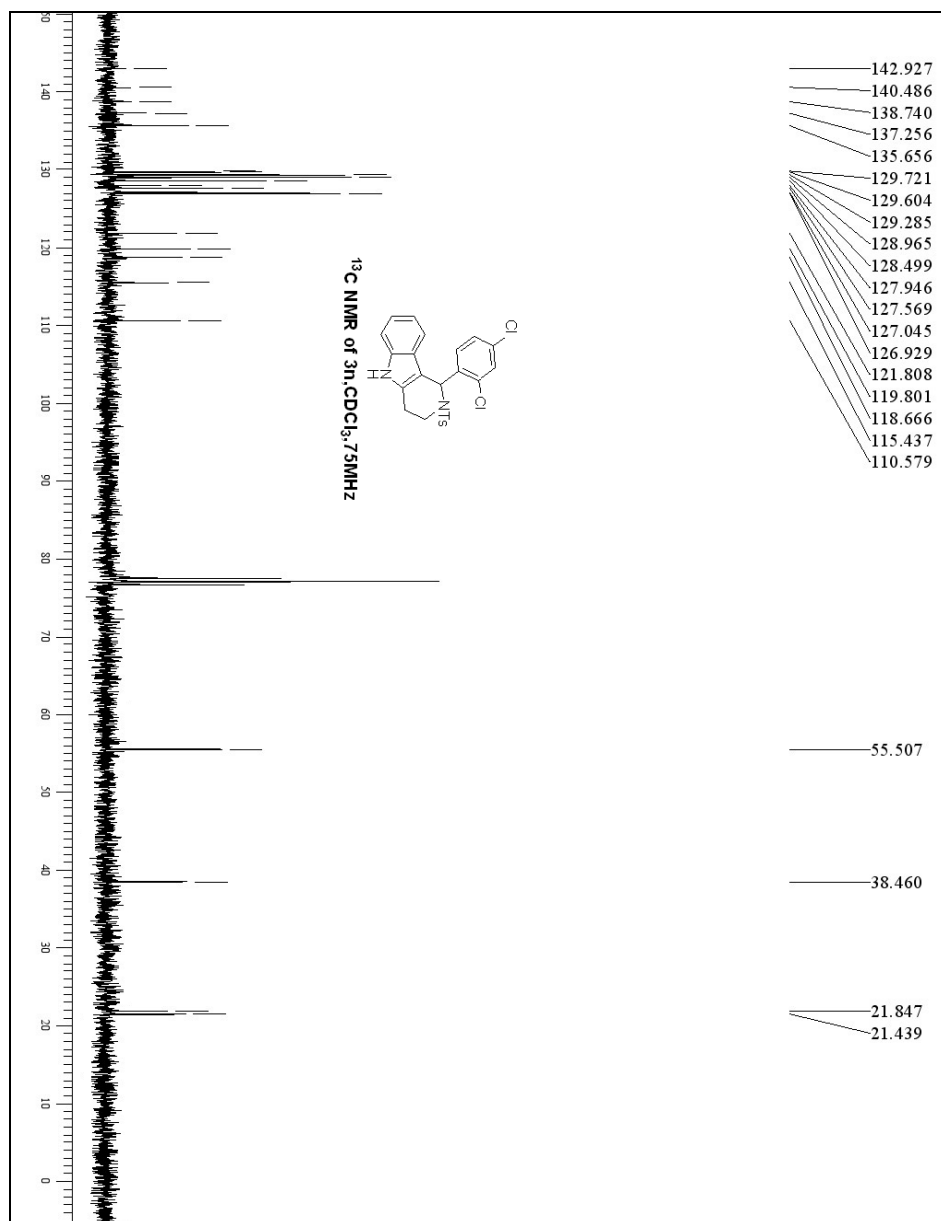

**(*E*)-1-Styryl-2-tosyl-2,3,4,5-tetrahydro-1*H*-pyrido[4,3-*b*]indole (3o; Table 2; Entry o):**

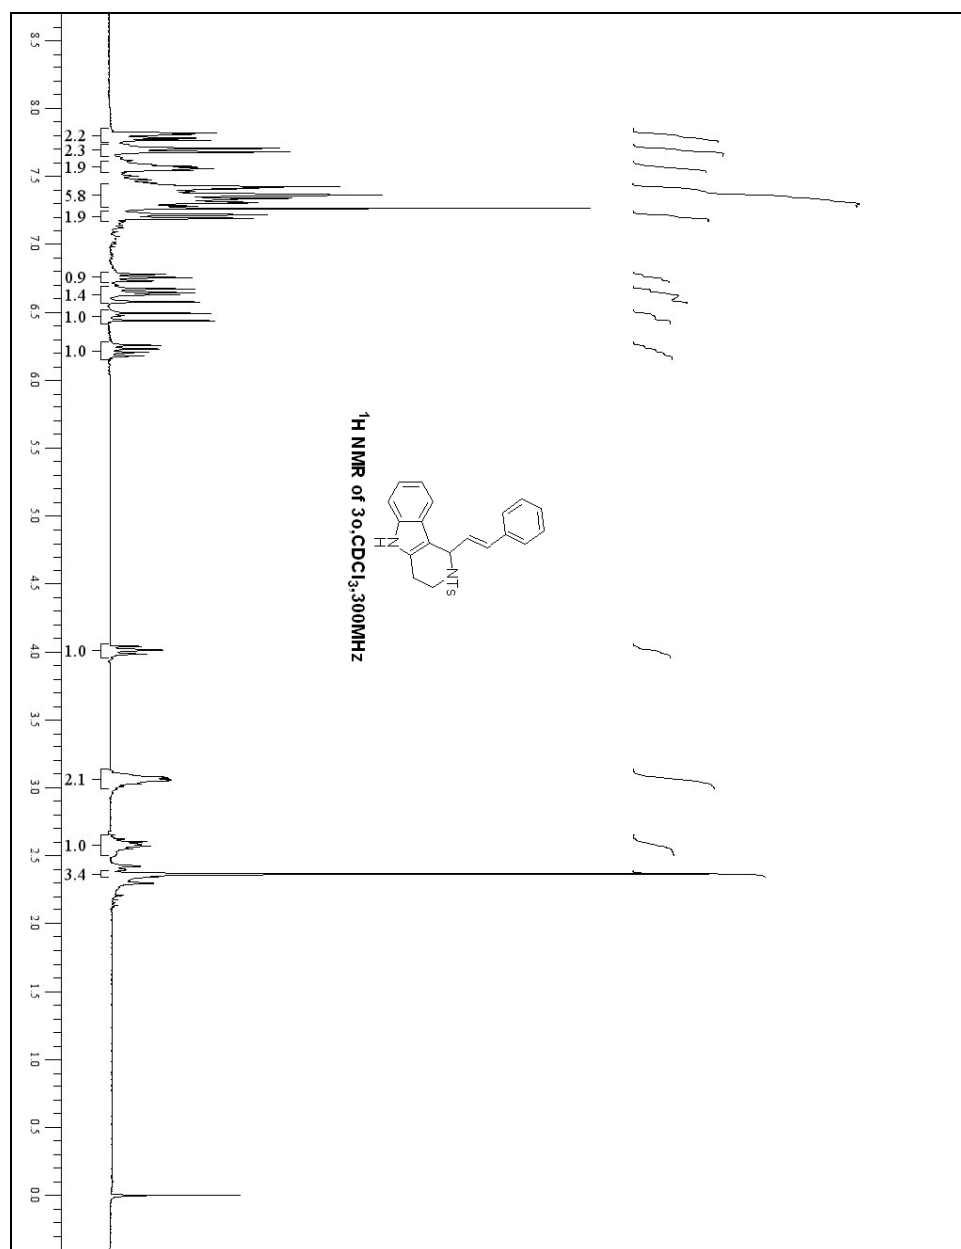

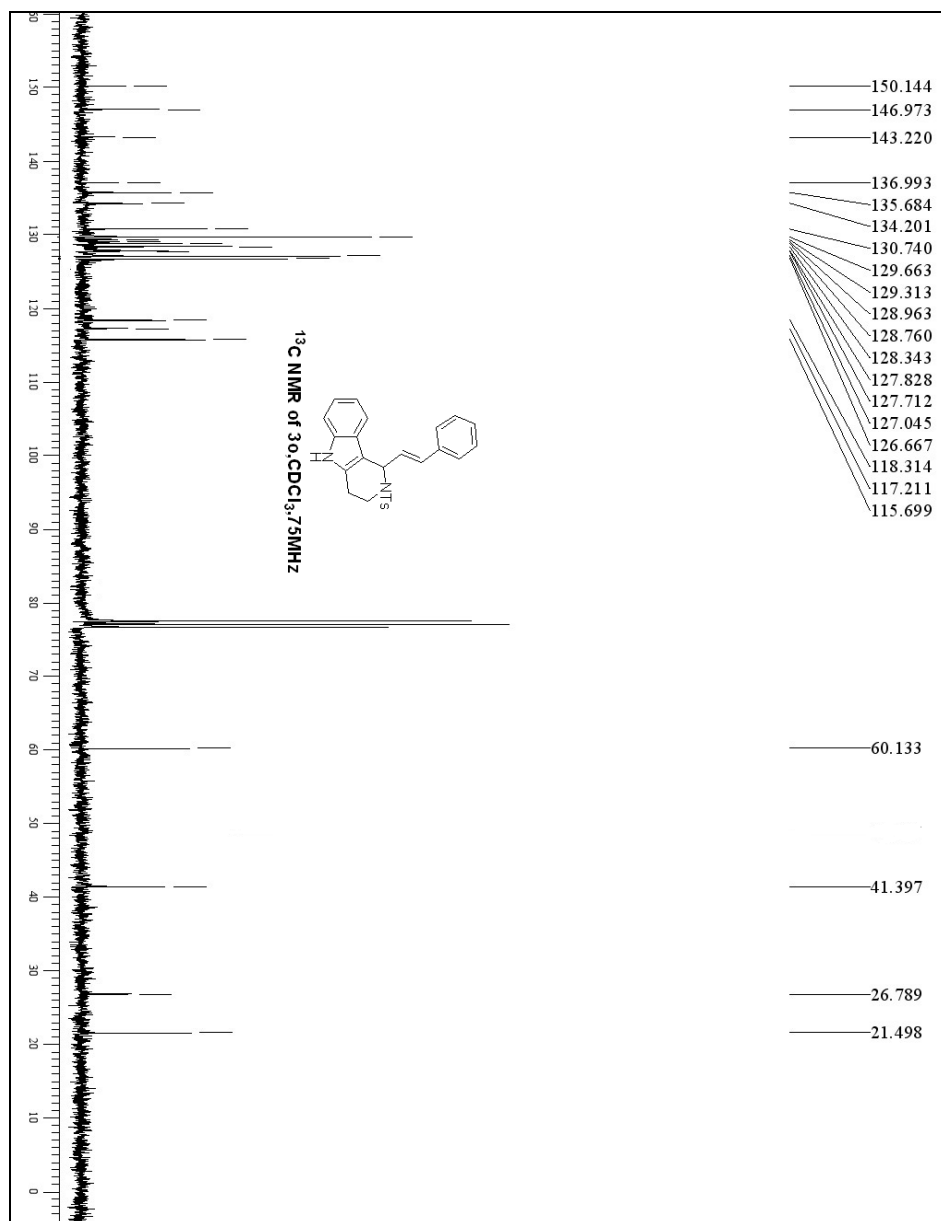



**1-(Naphthalen-1-yl)-2-tosyl-2,3,4,5-tetrahydro-1*H*-pyrido[4,3-*b*]indole (3p; Table 2; Entry p)**

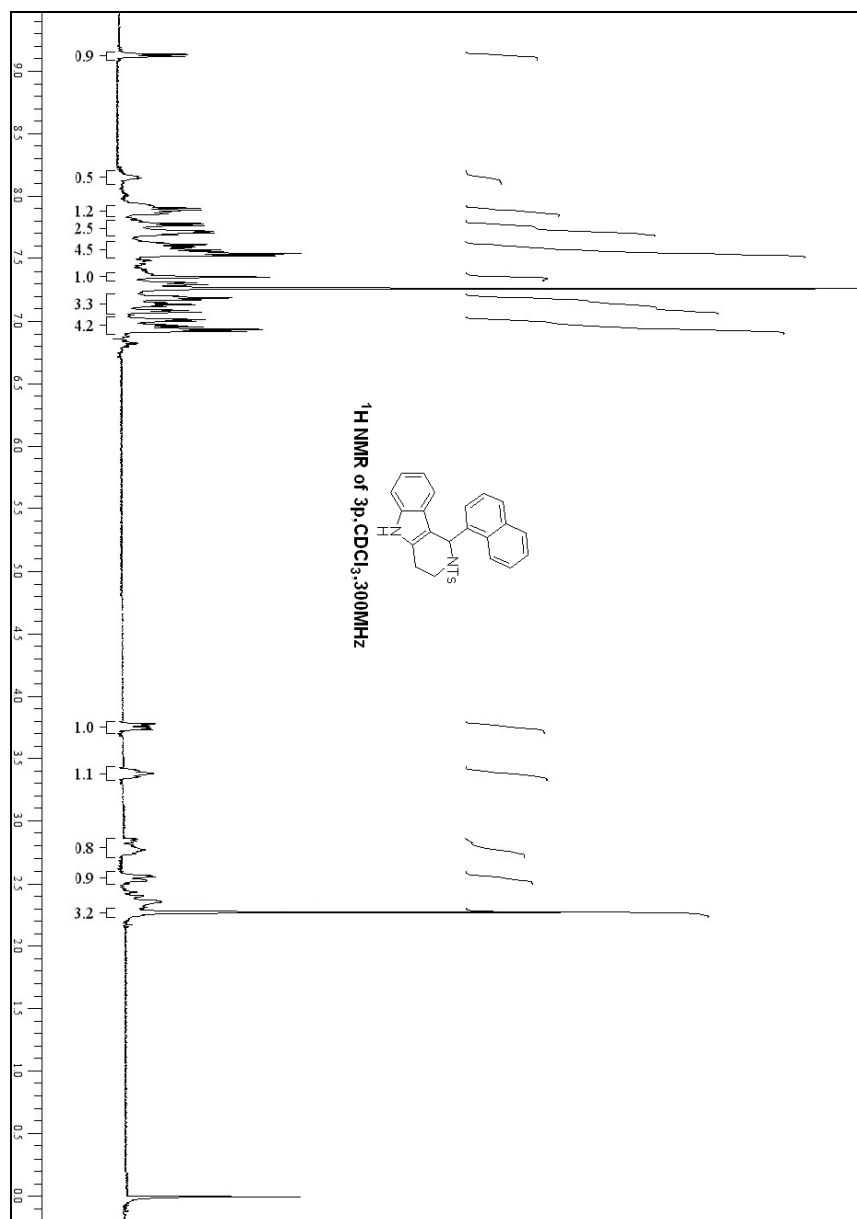

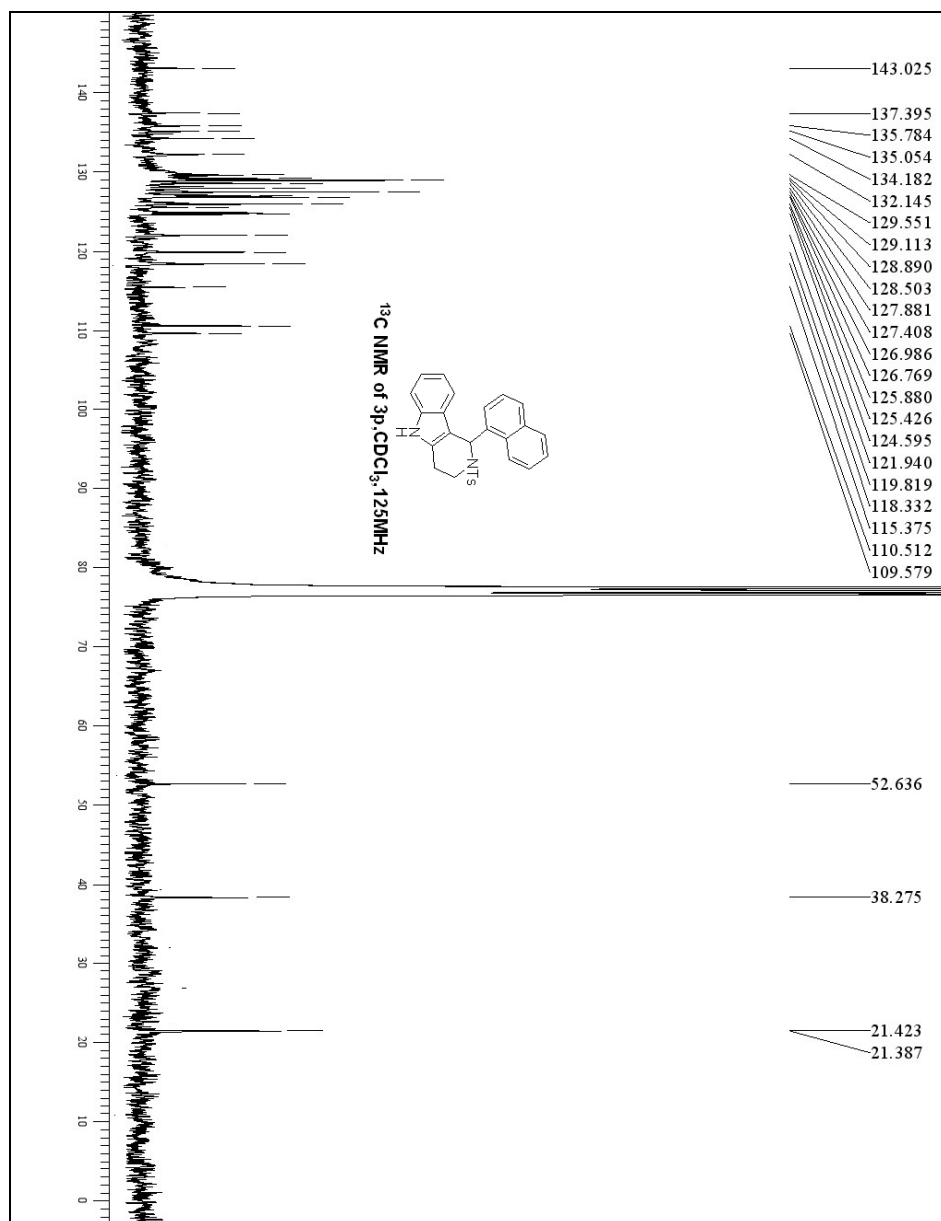

**1-(Naphthalen-2-yl)-2-tosyl-2,3,4,5-tetrahydro-1*H*-pyrido[4,3-*b*]indole (3q; Table 2; Entry q)**

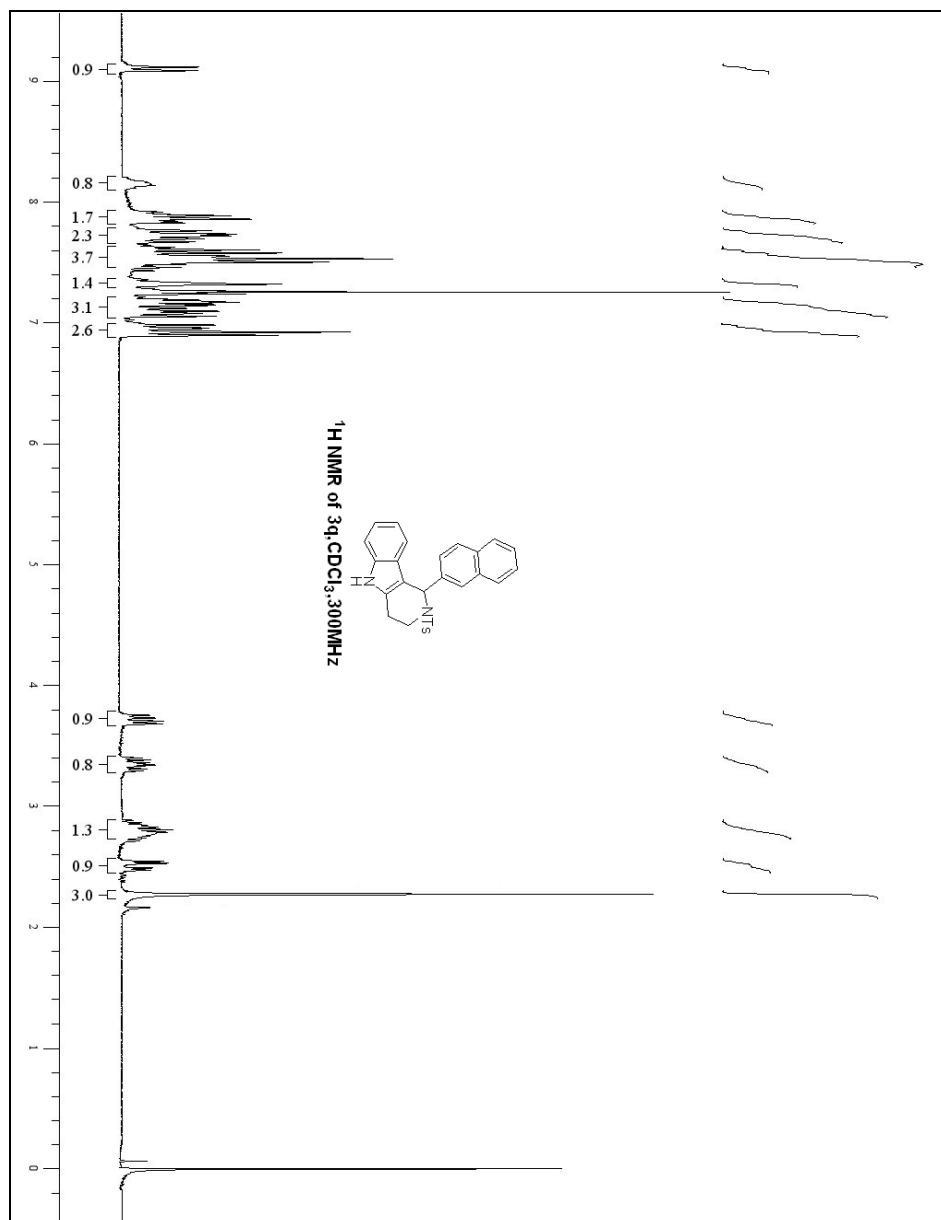

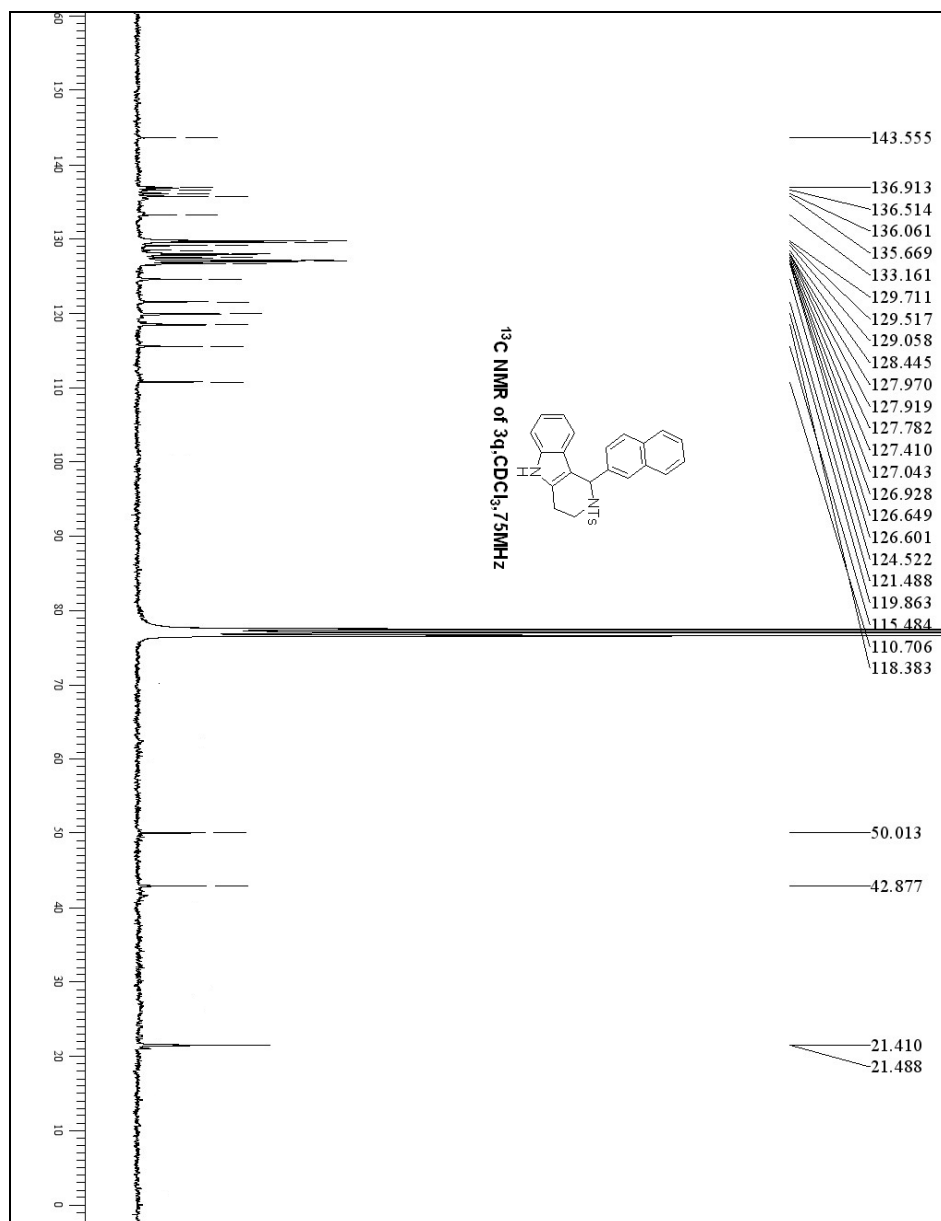

**1-Cyclohexyl-2-tosyl-2,3,4,5-tetrahydro-1*H*-pyrido[4,3-*b*]indole (3r; Table 2; Entry r):**

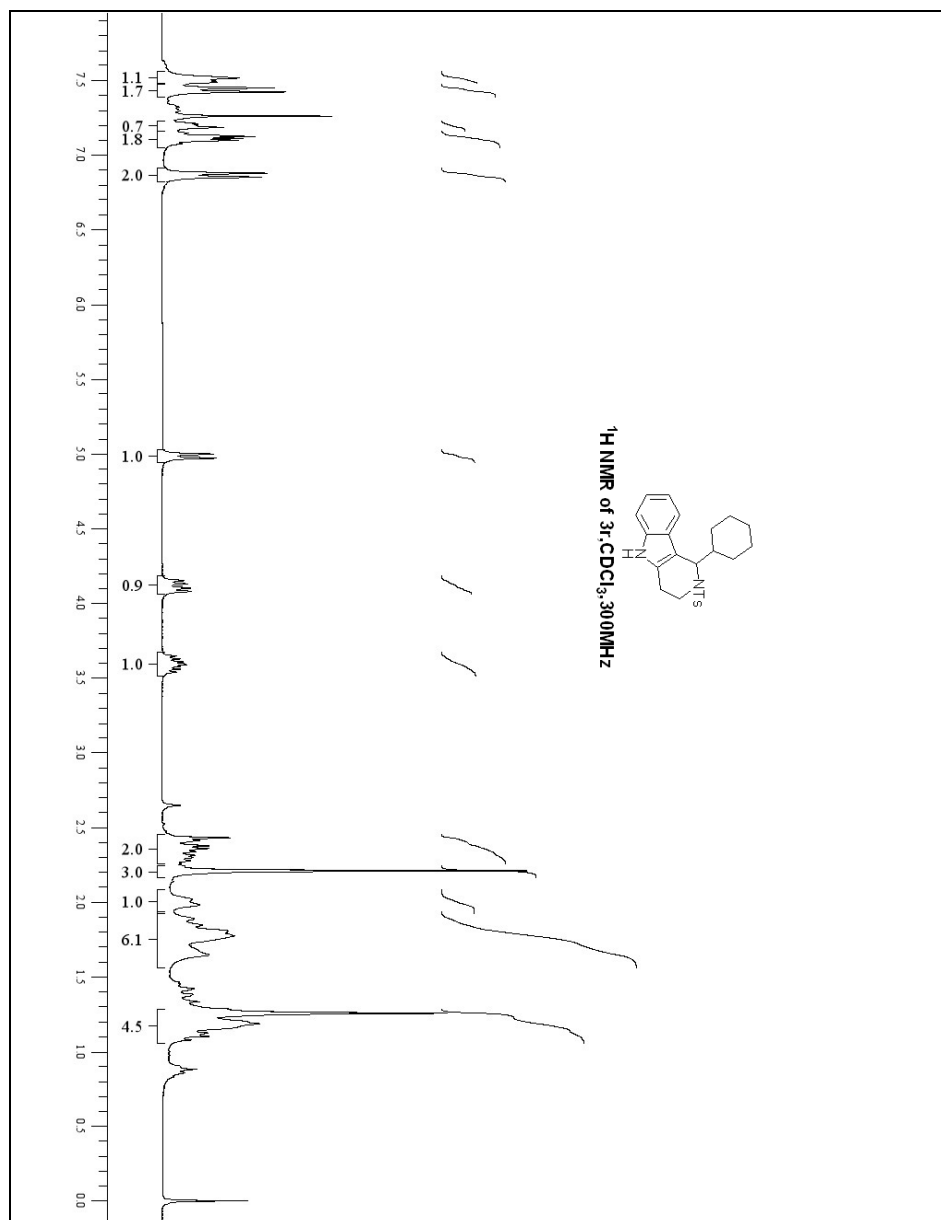

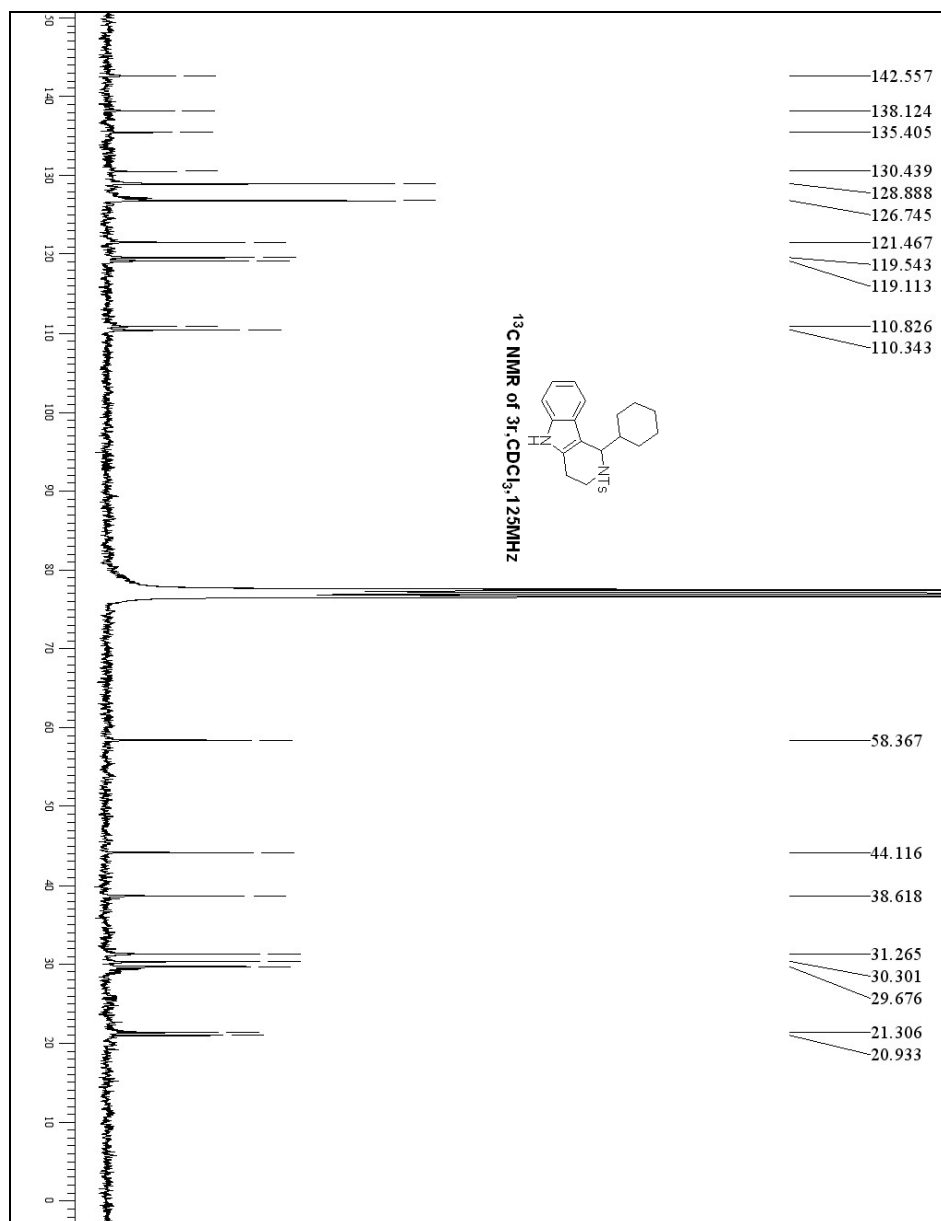

**1-(4-chlorophenyl)-8-methoxy-2-tosyl-2,3,4,5-tetrahydro-1H-pyrido[4,3-b]indole (3s)**

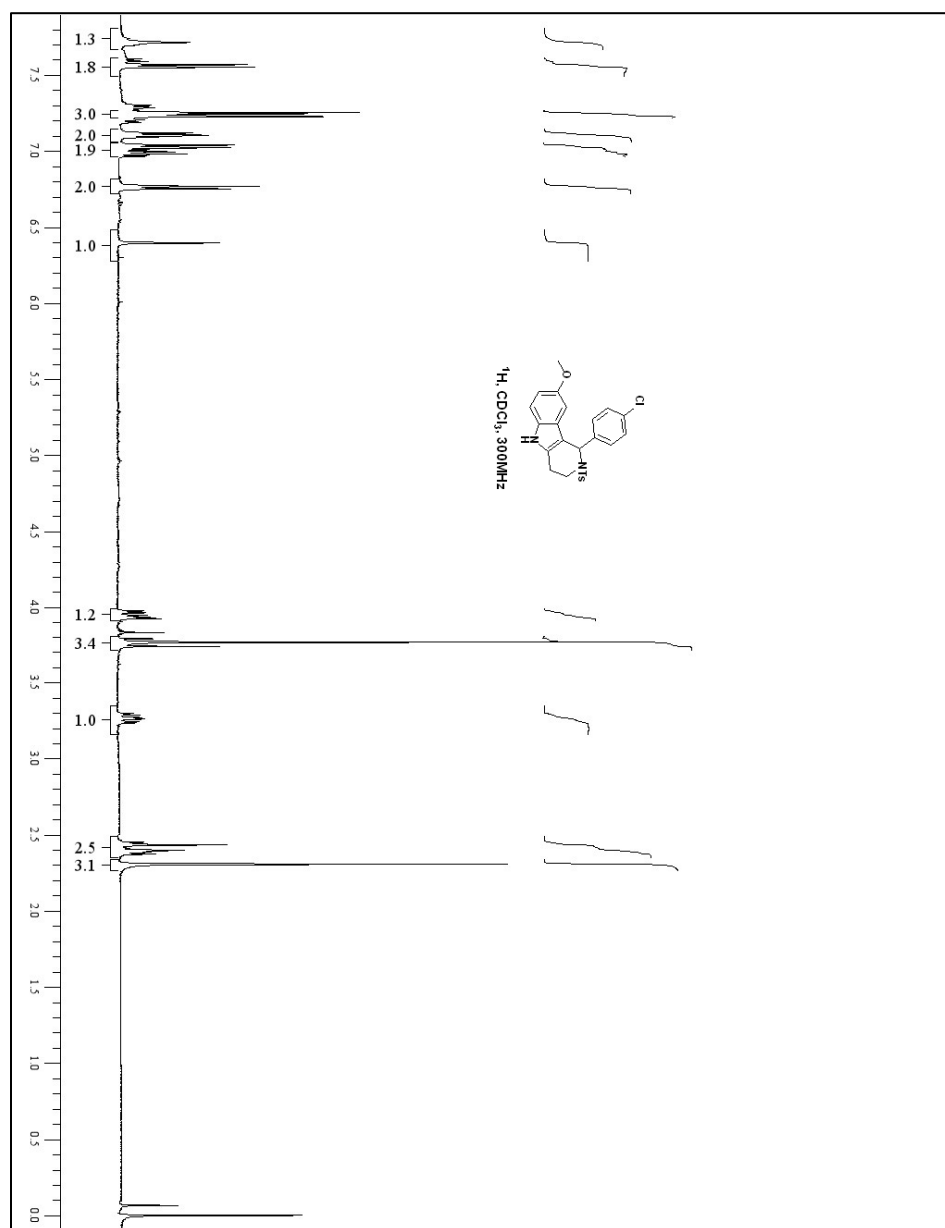

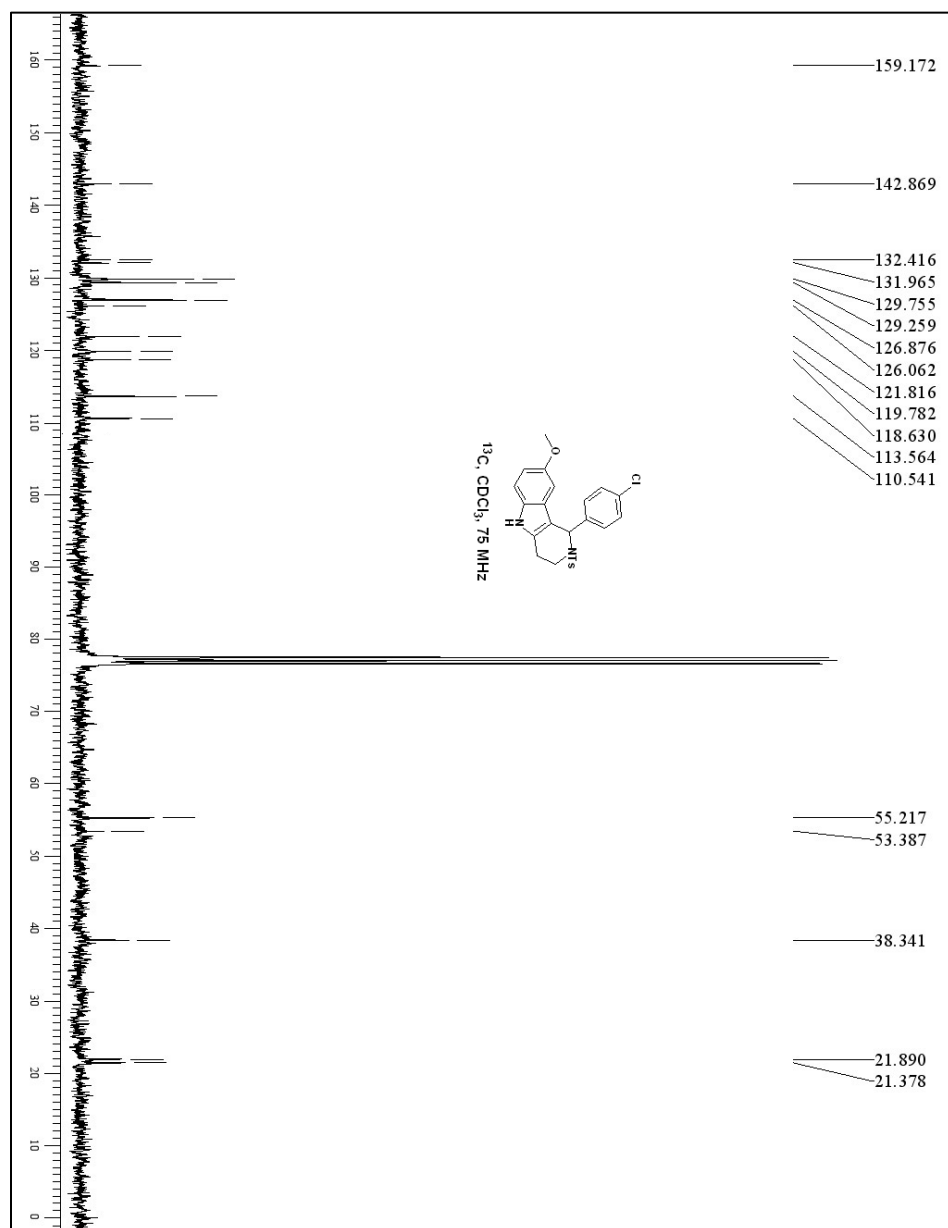

Supplement: Supplementary file 1 [file 4100623]
